# Supplementary material for: A robust qualitative transcriptional signature for the correct pathological diagnosis of gastric cancer
Source: J Transl Med. 2019 Feb 28;17:63. doi: 10.1186/s12967-019-1816-4 (PMC6394047; doi:10.1186/s12967-019-1816-4)
Supplement: Supplementary file 4 — Additional file 4. The REOs of the top gene pairs. The distributions of REOs of the top six gene pairs in each of the training datasets. [file 12967_2019_1816_MOESM4_ESM.xls]

## Sheet: GSE54129
Sample	Type	The relative expression orderings of the top 6 gene pairs
		CYR61 VS MMP28(A VS B)	CYR61 VS ACOX1(A VS B)	CYR61 vs GALNT10(A VS B)	CYR61 vsMMP28(A VS B)	ITGA5 vs TGFA(A VS B)	THY1 vs KAZALD1(A VS B)
GSM1308413	gastric cancer	A>B	A>B	A>B	A>B	A>B	A>B
GSM1308414	gastric cancer	A>B	A>B	A>B	A>B	A>B	A>B
GSM1308415	gastric cancer	A>B	A>B	A>B	A>B	A>B	A>B
GSM1308416	gastric cancer	A>B	A>B	A>B	A>B	A>B	A>B
GSM1308417	gastric cancer	A>B	A>B	A>B	A>B	A>B	A>B
GSM1308418	gastric cancer	A>B	A>B	A>B	A>B	A>B	A>B
GSM1308419	gastric cancer	A>B	A>B	A>B	A>B	A>B	A>B
GSM1308420	gastric cancer	A>B	A>B	A>B	A>B	A>B	A>B
GSM1308421	gastric cancer	A>B	A>B	A>B	A>B	A>B	A>B
GSM1308422	gastric cancer	A>B	A>B	A>B	A>B	A>B	A>B
GSM1308423	gastric cancer	A>B	A>B	A>B	A>B	A>B	A>B
GSM1308424	gastric cancer	A>B	A>B	A>B	A>B	A>B	A>B
GSM1308425	gastric cancer	A>B	A>B	A>B	A>B	A>B	A>B
GSM1308426	gastric cancer	A>B	A>B	A>B	A>B	A>B	A>B
GSM1308427	gastric cancer	A>B	A>B	A>B	A>B	A>B	A>B
GSM1308428	gastric cancer	A>B	A>B	A>B	A>B	A>B	A>B
GSM1308429	gastric cancer	A>B	A>B	A>B	A>B	A>B	A>B
GSM1308430	gastric cancer	A>B	A>B	A>B	A>B	A>B	A>B
GSM1308431	gastric cancer	A>B	A>B	A>B	A>B	A>B	A>B
GSM1308432	gastric cancer	A>B	A>B	A>B	A>B	A>B	A>B
GSM1308433	gastric cancer	A>B	A>B	A>B	A>B	A>B	A>B
GSM1308434	gastric cancer	A>B	A>B	A>B	A>B	A>B	A>B
GSM1308435	gastric cancer	A>B	A>B	A>B	A>B	A>B	A>B
GSM1308436	gastric cancer	A>B	A>B	A>B	A>B	A>B	A>B
GSM1308437	gastric cancer	A>B	A>B	A>B	A>B	A>B	A>B
GSM1308438	gastric cancer	A>B	A>B	A>B	A>B	A>B	A>B
GSM1308439	gastric cancer	A>B	A>B	A>B	A>B	A>B	A>B
GSM1308440	gastric cancer	A>B	A>B	A>B	A>B	A>B	A>B
GSM1308441	gastric cancer	A>B	A>B	A>B	A>B	A>B	A>B
GSM1308442	gastric cancer	A>B	A>B	A>B	A>B	A>B	A>B
GSM1308443	gastric cancer	A>B	A>B	A>B	A>B	A>B	A>B
GSM1308444	gastric cancer	A>B	A>B	A>B	A>B	A>B	A>B
GSM1308445	gastric cancer	A>B	A>B	A>B	A>B	A>B	A>B
GSM1308446	gastric cancer	A>B	A>B	A>B	A>B	A>B	A>B
GSM1308447	gastric cancer	A>B	A>B	A>B	A>B	A>B	A>B
GSM1308448	gastric cancer	A>B	A>B	A>B	A>B	A>B	A>B
GSM1308449	gastric cancer	A>B	A>B	A>B	A>B	A>B	A>B
GSM1308450	gastric cancer	A>B	A>B	A>B	A>B	A>B	A>B
GSM1308451	gastric cancer	A>B	A>B	A>B	A>B	A>B	A>B
GSM1308452	gastric cancer	A>B	A>B	A>B	A>B	A>B	A>B
GSM1308453	gastric cancer	A>B	A>B	A>B	A>B	A>B	A>B
GSM1308454	gastric cancer	A>B	A>B	A>B	A>B	A>B	A>B
GSM1308455	gastric cancer	A>B	A>B	A>B	A>B	A>B	A>B
GSM1308456	gastric cancer	A>B	A<B	A<B	A>B	A>B	A>B
GSM1308457	gastric cancer	A>B	A>B	A>B	A>B	A>B	A>B
GSM1308458	gastric cancer	A>B	A>B	A>B	A>B	A>B	A>B
GSM1308459	gastric cancer	A>B	A>B	A>B	A>B	A>B	A>B
GSM1308460	gastric cancer	A>B	A>B	A>B	A>B	A>B	A>B
GSM1308461	gastric cancer	A>B	A>B	A>B	A>B	A>B	A>B
GSM1308462	gastric cancer	A>B	A>B	A>B	A>B	A>B	A>B
GSM1308463	gastric cancer	A>B	A>B	A>B	A>B	A>B	A>B
GSM1308464	gastric cancer	A>B	A>B	A>B	A>B	A>B	A>B
GSM1308465	gastric cancer	A>B	A>B	A>B	A>B	A>B	A>B
GSM1308466	gastric cancer	A>B	A>B	A>B	A>B	A>B	A>B
GSM1308467	gastric cancer	A>B	A>B	A>B	A>B	A>B	A>B
GSM1308468	gastric cancer	A>B	A>B	A>B	A>B	A>B	A>B
GSM1308469	gastric cancer	A>B	A>B	A>B	A>B	A>B	A>B
GSM1308470	gastric cancer	A>B	A>B	A>B	A>B	A>B	A>B
GSM1308471	gastric cancer	A>B	A>B	A>B	A>B	A>B	A>B
GSM1308472	gastric cancer	A>B	A>B	A>B	A>B	A>B	A>B
GSM1308473	gastric cancer	A>B	A>B	A>B	A>B	A>B	A>B
GSM1308474	gastric cancer	A>B	A>B	A>B	A>B	A>B	A>B
GSM1308475	gastric cancer	A>B	A>B	A>B	A>B	A>B	A>B
GSM1308476	gastric cancer	A>B	A>B	A>B	A>B	A>B	A>B
GSM1308477	gastric cancer	A>B	A>B	A>B	A>B	A>B	A>B
GSM1308478	gastric cancer	A>B	A>B	A>B	A>B	A>B	A>B
GSM1308479	gastric cancer	A>B	A<B	A<B	A>B	A>B	A>B
GSM1308480	gastric cancer	A>B	A>B	A>B	A>B	A>B	A>B
GSM1308481	gastric cancer	A>B	A>B	A>B	A>B	A>B	A>B
GSM1308482	gastric cancer	A>B	A>B	A>B	A>B	A>B	A>B
GSM1308483	gastric cancer	A>B	A>B	A>B	A>B	A>B	A>B
GSM1308484	gastric cancer	A>B	A>B	A>B	A>B	A>B	A>B
GSM1308485	gastric cancer	A>B	A>B	A>B	A>B	A>B	A>B
GSM1308486	gastric cancer	A>B	A>B	A>B	A>B	A>B	A>B
GSM1308487	gastric cancer	A>B	A>B	A>B	A>B	A>B	A>B
GSM1308488	gastric cancer	A>B	A>B	A>B	A>B	A>B	A>B
GSM1308489	gastric cancer	A>B	A>B	A>B	A>B	A>B	A>B
GSM1308490	gastric cancer	A>B	A>B	A>B	A>B	A>B	A>B
GSM1308491	gastric cancer	A>B	A>B	A>B	A>B	A>B	A>B
GSM1308492	gastric cancer	A>B	A>B	A>B	A>B	A>B	A>B
GSM1308493	gastric cancer	A>B	A>B	A>B	A>B	A>B	A>B
GSM1308494	gastric cancer	A>B	A>B	A>B	A>B	A>B	A>B
GSM1308495	gastric cancer	A>B	A>B	A>B	A>B	A>B	A>B
GSM1308496	gastric cancer	A>B	A>B	A>B	A>B	A>B	A>B
GSM1308497	gastric cancer	A>B	A>B	A>B	A>B	A>B	A>B
GSM1308498	gastric cancer	A>B	A>B	A>B	A>B	A>B	A>B
GSM1308499	gastric cancer	A>B	A>B	A>B	A>B	A>B	A>B
GSM1308500	gastric cancer	A>B	A>B	A>B	A>B	A>B	A>B
GSM1308501	gastric cancer	A>B	A>B	A>B	A>B	A>B	A>B
GSM1308502	gastric cancer	A>B	A>B	A>B	A>B	A>B	A>B
GSM1308503	gastric cancer	A>B	A>B	A>B	A>B	A>B	A>B
GSM1308504	gastric cancer	A>B	A>B	A>B	A>B	A>B	A>B
GSM1308505	gastric cancer	A>B	A>B	A>B	A>B	A>B	A>B
GSM1308506	gastric cancer	A>B	A>B	A>B	A>B	A>B	A>B
GSM1308507	gastric cancer	A>B	A>B	A>B	A>B	A>B	A>B
GSM1308508	gastric cancer	A>B	A>B	A>B	A>B	A>B	A>B
GSM1308509	gastric cancer	A>B	A>B	A>B	A>B	A>B	A>B
GSM1308510	gastric cancer	A>B	A>B	A>B	A>B	A>B	A>B
GSM1308511	gastric cancer	A>B	A>B	A>B	A>B	A>B	A>B
GSM1308512	gastric cancer	A>B	A>B	A>B	A>B	A>B	A>B
GSM1308513	gastric cancer	A>B	A>B	A>B	A>B	A>B	A>B
GSM1308514	gastric cancer	A>B	A>B	A>B	A>B	A>B	A>B
GSM1308515	gastric cancer	A>B	A>B	A>B	A>B	A>B	A>B
GSM1308516	gastric cancer	A>B	A>B	A>B	A>B	A>B	A>B
GSM1308517	gastric cancer	A>B	A>B	A>B	A>B	A>B	A>B
GSM1308518	gastric cancer	A>B	A>B	A>B	A>B	A>B	A>B
GSM1308519	gastric cancer	A>B	A>B	A>B	A>B	A>B	A>B
GSM1308520	gastric cancer	A>B	A>B	A>B	A>B	A>B	A>B
GSM1308521	gastric cancer	A>B	A>B	A>B	A<B	A>B	A>B
GSM1308522	gastric cancer	A>B	A>B	A>B	A>B	A>B	A>B
GSM1308523	gastric cancer	A>B	A>B	A>B	A>B	A>B	A>B
GSM1308392	normal*	A<B	A<B	A<B	A<B	A<B	A<B
GSM1308393	normal*	A<B	A<B	A<B	A<B	A<B	A<B
GSM1308394	normal*	A<B	A<B	A<B	A<B	A<B	A<B
GSM1308395	normal*	A<B	A<B	A<B	A<B	A<B	A<B
GSM1308396	normal*	A<B	A<B	A<B	A<B	A<B	A<B
GSM1308397	normal*	A<B	A<B	A<B	A<B	A<B	A<B
GSM1308398	normal*	A<B	A<B	A<B	A<B	A<B	A<B
GSM1308399	normal*	A<B	A<B	A<B	A<B	A<B	A<B
GSM1308400	normal*	A<B	A<B	A<B	A<B	A<B	A<B
GSM1308401	normal*	A<B	A<B	A<B	A<B	A<B	A<B
GSM1308402	normal*	A<B	A<B	A<B	A<B	A<B	A<B
GSM1308403	normal*	A<B	A<B	A<B	A<B	A<B	A<B
GSM1308404	normal*	A<B	A<B	A<B	A<B	A<B	A<B
GSM1308405	normal*	A<B	A<B	A<B	A<B	A<B	A<B
GSM1308406	normal*	A<B	A<B	A<B	A<B	A<B	A<B
GSM1308407	normal*	A<B	A<B	A<B	A<B	A<B	A<B
GSM1308408	normal*	A<B	A<B	A<B	A<B	A<B	A<B
GSM1308409	normal*	A<B	A<B	A<B	A<B	A<B	A<B
GSM1308410	normal*	A<B	A<B	A<B	A<B	A<B	A<B
GSM1308411	normal*	A<B	A<B	A<B	A<B	A<B	A<B
GSM1308412	normal*	A<B	A<B	A<B	A<B	A<B	A<B

## Sheet: GSE54043
Sample	Type	The relative expression orderings of the top 6 gene pairs
		CYR61 VS MMP28(A VS B)	CYR61 VS ACOX1(A VS B)	CYR61 vs GALNT10(A VS B)	CYR61 vsMMP28(A VS B)	ITGA5 vs TGFA(A VS B)	THY1 vs KAZALD1(A VS B)
GSM1306291	normal*	A<B	A<B	A<B	A<B	A<B	A<B
GSM1306292	normal*	A<B	A<B	A<B	A<B	A<B	A<B
GSM1306293	normal*	A<B	A<B	A<B	A<B	A<B	A<B
GSM1306294	normal*	A<B	A<B	A<B	A<B	A<B	A<B
GSM1306295	normal*	A<B	A<B	A<B	A<B	A<B	A<B
GSM1306296	Gastritis*	A<B	A<B	A<B	A<B	A<B	A<B
GSM1306297	Gastritis*	A<B	A<B	A<B	A<B	A<B	A<B
GSM1306298	Gastritis*	A<B	A<B	A<B	A<B	A<B	A<B
GSM1306299	Gastritis*	A<B	A<B	A<B	A<B	A<B	A<B
GSM1306300	Gastritis*	A<B	A<B	A<B	A<B	A<B	A<B

## Sheet: GSE42252
Sample	Type	The relative expression orderings of the top 6 gene pairs
		CYR61 VS MMP28(A VS B)	CYR61 VS ACOX1(A VS B)	CYR61 vs GALNT10(A VS B)	CYR61 vsMMP28(A VS B)	ITGA5 vs TGFA(A VS B)	THY1 vs KAZALD1(A VS B)
GSM1036299	gastric cancer	A>B	A>B	A>B	A>B	A>B	A>B
GSM1036300	gastric cancer	A>B	A>B	A>B	A>B	A>B	A>B
GSM1036301	gastric cancer	A>B	A>B	A>B	A>B	A>B	A>B
GSM1036302	gastric cancer	A>B	A>B	A>B	A>B	A>B	A>B
GSM1036303	gastric cancer	A>B	A>B	A>B	A>B	A>B	A>B

## Sheet: GSE38749
Sample	Type	The relative expression orderings of the top 6 gene pairs
		CYR61 VS MMP28(A VS B)	CYR61 VS ACOX1(A VS B)	CYR61 vs GALNT10(A VS B)	CYR61 vsMMP28(A VS B)	ITGA5 vs TGFA(A VS B)	THY1 vs KAZALD1(A VS B)
GSM949009	gastric cancer	A>B	A>B	A>B	A>B	A>B	A>B
GSM949010	gastric cancer	A>B	A>B	A>B	A>B	A>B	A>B
GSM949011	gastric cancer	A>B	A>B	A>B	A>B	A>B	A>B
GSM949012	gastric cancer	A>B	A>B	A>B	A>B	A>B	A>B
GSM949013	gastric cancer	A>B	A>B	A>B	A>B	A>B	A>B
GSM949014	gastric cancer	A>B	A>B	A>B	A>B	A>B	A>B
GSM949015	gastric cancer	A>B	A>B	A>B	A>B	A>B	A>B
GSM949016	gastric cancer	A>B	A>B	A>B	A>B	A>B	A>B
GSM949017	gastric cancer	A>B	A>B	A>B	A>B	A>B	A>B
GSM949018	gastric cancer	A>B	A>B	A>B	A>B	A>B	A>B
GSM949019	gastric cancer	A>B	A>B	A>B	A>B	A>B	A>B
GSM949020	gastric cancer	A>B	A>B	A>B	A>B	A>B	A>B
GSM949021	gastric cancer	A>B	A>B	A>B	A>B	A>B	A>B
GSM949022	gastric cancer	A>B	A>B	A>B	A>B	A>B	A>B
GSM949023	gastric cancer	A>B	A>B	A>B	A>B	A>B	A>B

## Sheet: GSE51725
Sample	Type	The relative expression orderings of the top 6 gene pairs
		CYR61 VS MMP28(A VS B)	CYR61 VS ACOX1(A VS B)	CYR61 vs GALNT10(A VS B)	CYR61 vsMMP28(A VS B)	ITGA5 vs TGFA(A VS B)	THY1 vs KAZALD1(A VS B)
GSM1251553	gastric cancer	A>B	A>B	A>B	A>B	A>B	A>B
GSM1251554	gastric cancer	A>B	A>B	A>B	A>B	A>B	A>B
GSM1251555	gastric cancer	A>B	A>B	A>B	A>B	A>B	A>B
GSM1251556	gastric cancer	A<B	A>B	A<B	A>B	A>B	A>B
GSM1251557	gastric cancer	A>B	A>B	A>B	A>B	A>B	A>B
GSM1251558	gastric cancer	A>B	A>B	A>B	A>B	A>B	A>B
GSM1251559	gastric cancer	A>B	A>B	A>B	A>B	A>B	A>B
GSM1251560	gastric cancer	A>B	A>B	A>B	A>B	A>B	A>B

## Sheet: GSE79973
Sample	Type	The relative expression orderings of the top 6 gene pairs
		CYR61 VS MMP28(A VS B)	CYR61 VS ACOX1(A VS B)	CYR61 vs GALNT10(A VS B)	CYR61 vsMMP28(A VS B)	ITGA5 vs TGFA(A VS B)	THY1 vs KAZALD1(A VS B)
GSM2109532	gastric cancer	A>B	A>B	A>B	A>B	A>B	A>B
GSM2109534	gastric cancer	A>B	A>B	A>B	A>B	A>B	A>B
GSM2109536	gastric cancer	A>B	A>B	A>B	A>B	A>B	A>B
GSM2109538	gastric cancer	A>B	A>B	A>B	A>B	A>B	A>B
GSM2109540	gastric cancer	A>B	A>B	A>B	A>B	A>B	A>B
GSM2109542	gastric cancer	A>B	A>B	A>B	A>B	A>B	A>B
GSM2109544	gastric cancer	A>B	A>B	A>B	A>B	A<B	A>B
GSM2109546	gastric cancer	A>B	A>B	A>B	A>B	A>B	A>B
GSM2109548	gastric cancer	A>B	A>B	A>B	A>B	A<B	A<B
GSM2109550	gastric cancer	A>B	A>B	A>B	A>B	A>B	A>B

## Sheet: GSE57303
Sample	Type	The relative expression orderings of the top 6 gene pairs
		CYR61 VS MMP28(A VS B)	CYR61 VS ACOX1(A VS B)	CYR61 vs GALNT10(A VS B)	CYR61 vsMMP28(A VS B)	ITGA5 vs TGFA(A VS B)	THY1 vs KAZALD1(A VS B)
GSM1379261	gastric cancer	A>B	A>B	A>B	A>B	A>B	A>B
GSM1379262	gastric cancer	A>B	A>B	A>B	A>B	A>B	A>B
GSM1379263	gastric cancer	A>B	A>B	A>B	A>B	A>B	A>B
GSM1379264	gastric cancer	A>B	A>B	A>B	A>B	A>B	A>B
GSM1379265	gastric cancer	A>B	A>B	A>B	A>B	A>B	A>B
GSM1379266	gastric cancer	A>B	A>B	A>B	A>B	A>B	A>B
GSM1379267	gastric cancer	A>B	A>B	A>B	A>B	A>B	A>B
GSM1379268	gastric cancer	A>B	A>B	A>B	A>B	A>B	A>B
GSM1379269	gastric cancer	A>B	A>B	A>B	A>B	A>B	A>B
GSM1379270	gastric cancer	A>B	A>B	A>B	A>B	A>B	A>B
GSM1379271	gastric cancer	A>B	A>B	A>B	A>B	A>B	A>B
GSM1379272	gastric cancer	A>B	A>B	A>B	A>B	A>B	A>B
GSM1379273	gastric cancer	A>B	A>B	A>B	A>B	A>B	A>B
GSM1379274	gastric cancer	A>B	A>B	A>B	A>B	A>B	A>B
GSM1379275	gastric cancer	A>B	A>B	A>B	A>B	A>B	A>B
GSM1379276	gastric cancer	A>B	A>B	A>B	A>B	A>B	A>B
GSM1379277	gastric cancer	A>B	A>B	A>B	A>B	A>B	A>B
GSM1379278	gastric cancer	A>B	A>B	A>B	A>B	A>B	A>B
GSM1379279	gastric cancer	A>B	A>B	A>B	A>B	A>B	A>B
GSM1379280	gastric cancer	A>B	A>B	A>B	A>B	A>B	A>B
GSM1379281	gastric cancer	A>B	A>B	A>B	A>B	A>B	A>B
GSM1379282	gastric cancer	A>B	A>B	A>B	A>B	A>B	A>B
GSM1379283	gastric cancer	A>B	A>B	A>B	A>B	A>B	A>B
GSM1379284	gastric cancer	A>B	A>B	A>B	A>B	A>B	A>B
GSM1379285	gastric cancer	A>B	A>B	A>B	A>B	A>B	A>B
GSM1379286	gastric cancer	A>B	A>B	A>B	A>B	A>B	A>B
GSM1379287	gastric cancer	A>B	A>B	A>B	A>B	A>B	A>B
GSM1379288	gastric cancer	A>B	A>B	A>B	A>B	A>B	A>B
GSM1379289	gastric cancer	A>B	A>B	A>B	A>B	A>B	A>B
GSM1379290	gastric cancer	A>B	A>B	A>B	A>B	A>B	A>B
GSM1379291	gastric cancer	A>B	A>B	A>B	A>B	A>B	A>B
GSM1379292	gastric cancer	A>B	A>B	A>B	A>B	A<B	A>B
GSM1379293	gastric cancer	A>B	A>B	A>B	A>B	A>B	A>B
GSM1379294	gastric cancer	A>B	A>B	A>B	A>B	A>B	A>B
GSM1379295	gastric cancer	A>B	A>B	A>B	A>B	A>B	A>B
GSM1379296	gastric cancer	A>B	A>B	A>B	A>B	A>B	A>B
GSM1379297	gastric cancer	A>B	A>B	A>B	A>B	A>B	A>B
GSM1379298	gastric cancer	A>B	A>B	A>B	A>B	A>B	A>B
GSM1379299	gastric cancer	A>B	A>B	A>B	A>B	A>B	A>B
GSM1379300	gastric cancer	A>B	A>B	A>B	A>B	A>B	A>B
GSM1379301	gastric cancer	A>B	A>B	A>B	A>B	A>B	A>B
GSM1379302	gastric cancer	A>B	A>B	A>B	A>B	A>B	A>B
GSM1379303	gastric cancer	A>B	A>B	A>B	A>B	A>B	A>B
GSM1379304	gastric cancer	A>B	A>B	A>B	A>B	A>B	A>B
GSM1379305	gastric cancer	A>B	A>B	A>B	A>B	A>B	A>B
GSM1379306	gastric cancer	A>B	A>B	A>B	A>B	A>B	A>B
GSM1379307	gastric cancer	A>B	A>B	A>B	A>B	A>B	A>B
GSM1379308	gastric cancer	A>B	A>B	A>B	A>B	A>B	A>B
GSM1379309	gastric cancer	A>B	A>B	A>B	A>B	A>B	A>B
GSM1379310	gastric cancer	A>B	A>B	A>B	A>B	A>B	A>B
GSM1379311	gastric cancer	A>B	A>B	A>B	A>B	A>B	A>B
GSM1379312	gastric cancer	A>B	A>B	A>B	A>B	A>B	A>B
GSM1379313	gastric cancer	A>B	A>B	A>B	A>B	A>B	A>B
GSM1379314	gastric cancer	A>B	A>B	A>B	A>B	A>B	A>B
GSM1379315	gastric cancer	A>B	A>B	A>B	A>B	A>B	A>B
GSM1379316	gastric cancer	A>B	A>B	A>B	A>B	A>B	A>B
GSM1379317	gastric cancer	A>B	A>B	A>B	A>B	A>B	A>B
GSM1379318	gastric cancer	A>B	A>B	A>B	A>B	A>B	A>B
GSM1379319	gastric cancer	A>B	A>B	A>B	A>B	A>B	A>B
GSM1379320	gastric cancer	A>B	A>B	A>B	A>B	A>B	A>B
GSM1379321	gastric cancer	A>B	A>B	A>B	A>B	A>B	A>B
GSM1379322	gastric cancer	A>B	A>B	A>B	A>B	A>B	A>B
GSM1379323	gastric cancer	A>B	A>B	A>B	A>B	A>B	A>B
GSM1379324	gastric cancer	A>B	A>B	A>B	A>B	A>B	A>B
GSM1379325	gastric cancer	A>B	A>B	A>B	A>B	A>B	A>B
GSM1379326	gastric cancer	A>B	A>B	A>B	A>B	A>B	A>B
GSM1379327	gastric cancer	A>B	A>B	A>B	A>B	A>B	A>B
GSM1379328	gastric cancer	A>B	A>B	A>B	A>B	A>B	A>B
GSM1379329	gastric cancer	A>B	A>B	A>B	A>B	A>B	A>B
GSM1379330	gastric cancer	A>B	A>B	A>B	A>B	A>B	A>B

## Sheet: GSE13911
Sample	Type	The relative expression orderings of the top 6 gene pairs
		CYR61 VS MMP28(A VS B)	CYR61 VS ACOX1(A VS B)	CYR61 vs GALNT10(A VS B)	CYR61 vsMMP28(A VS B)	ITGA5 vs TGFA(A VS B)	THY1 vs KAZALD1(A VS B)
GSM350411	gastric cancer	A>B	A>B	A>B	A>B	A>B	A>B
GSM350413	gastric cancer	A>B	A>B	A>B	A>B	A>B	A>B
GSM350415	gastric cancer	A<B	A>B	A>B	A>B	A>B	A>B
GSM350416	gastric cancer	A>B	A>B	A>B	A>B	A>B	A>B
GSM350418	gastric cancer	A>B	A>B	A>B	A>B	A>B	A>B
GSM350420	gastric cancer	A>B	A>B	A>B	A>B	A>B	A>B
GSM350422	gastric cancer	A>B	A>B	A>B	A>B	A>B	A>B
GSM350423	gastric cancer	A>B	A>B	A>B	A>B	A>B	A>B
GSM350425	gastric cancer	A>B	A>B	A>B	A>B	A>B	A>B
GSM350427	gastric cancer	A>B	A>B	A>B	A>B	A>B	A>B
GSM350429	gastric cancer	A>B	A>B	A>B	A>B	A>B	A>B
GSM350431	gastric cancer	A>B	A>B	A>B	A>B	A>B	A>B
GSM350432	gastric cancer	A>B	A>B	A>B	A>B	A>B	A>B
GSM350434	gastric cancer	A>B	A>B	A>B	A>B	A>B	A>B
GSM350436	gastric cancer	A>B	A>B	A>B	A>B	A>B	A>B
GSM350438	gastric cancer	A>B	A>B	A>B	A>B	A>B	A>B
GSM350440	gastric cancer	A>B	A>B	A>B	A>B	A>B	A>B
GSM350442	gastric cancer	A>B	A>B	A>B	A>B	A>B	A>B
GSM350443	gastric cancer	A>B	A>B	A>B	A>B	A>B	A>B
GSM350445	gastric cancer	A>B	A>B	A>B	A>B	A>B	A>B
GSM350447	gastric cancer	A>B	A>B	A>B	A>B	A>B	A>B
GSM350449	gastric cancer	A>B	A>B	A>B	A>B	A>B	A>B
GSM350451	gastric cancer	A>B	A>B	A>B	A>B	A>B	A>B
GSM350453	gastric cancer	A>B	A>B	A>B	A>B	A>B	A<B
GSM350455	gastric cancer	A>B	A>B	A>B	A>B	A>B	A>B
GSM350457	gastric cancer	A>B	A>B	A>B	A>B	A>B	A>B
GSM350459	gastric cancer	A>B	A>B	A>B	A>B	A>B	A>B
GSM350461	gastric cancer	A>B	A>B	A>B	A>B	A>B	A>B
GSM350463	gastric cancer	A>B	A>B	A>B	A>B	A>B	A>B
GSM350465	gastric cancer	A>B	A>B	A>B	A>B	A>B	A>B
GSM350466	gastric cancer	A>B	A>B	A>B	A>B	A>B	A>B
GSM350468	gastric cancer	A>B	A>B	A>B	A>B	A>B	A>B
GSM350470	gastric cancer	A>B	A>B	A>B	A>B	A>B	A>B
GSM350471	gastric cancer	A>B	A>B	A>B	A>B	A>B	A>B
GSM350473	gastric cancer	A>B	A>B	A>B	A>B	A>B	A>B
GSM350474	gastric cancer	A>B	A>B	A>B	A>B	A>B	A>B
GSM350476	gastric cancer	A>B	A>B	A>B	A>B	A>B	A>B
GSM350478	gastric cancer	A>B	A>B	A>B	A>B	A>B	A>B

## Sheet: GSE27411
Sample	Type	The relative expression orderings of the top 6 gene pairs
		CYR61 VS MMP28(A VS B)	CYR61 VS ACOX1(A VS B)	CYR61 vs GALNT10(A VS B)	CYR61 vsMMP28(A VS B)	ITGA5 vs TGFA(A VS B)	THY1 vs KAZALD1(A VS B)
GSM677730	Gastritis	A<B	A<B	A<B	A<B	A<B	A<B
GSM677731	Gastritis	A<B	A<B	A<B	A<B	A<B	A<B
GSM677732	Gastritis	A<B	A<B	A<B	A<B	A<B	A<B
GSM677733	Gastritis	A<B	A<B	A<B	A<B	A<B	A<B
GSM677734	Gastritis	A<B	A<B	A<B	A<B	A<B	A<B
GSM677735	Gastritis	A<B	A<B	A<B	A<B	A<B	A<B
GSM677736	Gastritis	A<B	A<B	A<B	A<B	A<B	A<B
GSM677737	Gastritis	A<B	A<B	A<B	A<B	A<B	A<B
GSM677738	Gastritis	A<B	A<B	A<B	A<B	A<B	A<B
GSM677739	Gastritis	A<B	A<B	A<B	A<B	A<B	A<B
GSM677740	Gastritis	A<B	A<B	A<B	A<B	A<B	A<B
GSM677741	Gastritis	A<B	A<B	A<B	A<B	A<B	A<B
GSM677742	Gastritis	A<B	A<B	A<B	A<B	A<B	A<B
GSM677743	Gastritis	A<B	A<B	A<B	A<B	A<B	A<B
GSM677744	Gastritis	A<B	A<B	A<B	A<B	A<B	A<B
GSM677745	Gastritis	A<B	A<B	A<B	A<B	A<B	A<B
GSM677746	Gastritis	A<B	A<B	A<B	A<B	A<B	A<B
GSM677747	Gastritis	A<B	A<B	A<B	A<B	A<B	A<B

## Sheet: GSE28541
Sample	Type	The relative expression orderings of the top 6 gene pairs
		CYR61 VS MMP28(A VS B)	CYR61 VS ACOX1(A VS B)	CYR61 vs GALNT10(A VS B)	CYR61 vsMMP28(A VS B)	ITGA5 vs TGFA(A VS B)	THY1 vs KAZALD1(A VS B)
GSM706739	gastric cancer	A>B	A>B	A>B	A>B	A>B	A>B
GSM706740	gastric cancer	A>B	A>B	A>B	A>B	A>B	A>B
GSM706741	gastric cancer	A>B	A>B	A>B	A>B	A>B	A>B
GSM706742	gastric cancer	A>B	A>B	A>B	A>B	A>B	A>B
GSM706743	gastric cancer	A>B	A>B	A>B	A>B	A>B	A>B
GSM706744	gastric cancer	A>B	A>B	A>B	A>B	A>B	A>B
GSM706745	gastric cancer	A>B	A>B	A>B	A>B	A>B	A>B
GSM706746	gastric cancer	A>B	A>B	A>B	A>B	A>B	A>B
GSM706747	gastric cancer	A>B	A>B	A>B	A>B	A>B	A>B
GSM706748	gastric cancer	A>B	A>B	A>B	A>B	A>B	A>B
GSM706749	gastric cancer	A>B	A>B	A>B	A>B	A>B	A>B
GSM706750	gastric cancer	A>B	A>B	A>B	A>B	A>B	A>B
GSM706751	gastric cancer	A>B	A>B	A>B	A>B	A>B	A>B
GSM706752	gastric cancer	A>B	A>B	A>B	A<B	A>B	A>B
GSM706753	gastric cancer	A>B	A>B	A>B	A>B	A>B	A>B
GSM706754	gastric cancer	A>B	A>B	A>B	A>B	A>B	A>B
GSM706755	gastric cancer	A>B	A>B	A>B	A>B	A>B	A>B
GSM706756	gastric cancer	A>B	A>B	A>B	A>B	A>B	A>B
GSM706757	gastric cancer	A>B	A>B	A>B	A>B	A>B	A>B
GSM706758	gastric cancer	A>B	A>B	A>B	A>B	A>B	A>B
GSM706759	gastric cancer	A>B	A>B	A>B	A>B	A>B	A>B
GSM706760	gastric cancer	A>B	A>B	A>B	A>B	A>B	A>B
GSM706761	gastric cancer	A>B	A>B	A>B	A>B	A>B	A>B
GSM706762	gastric cancer	A>B	A>B	A>B	A>B	A>B	A>B
GSM706763	gastric cancer	A>B	A>B	A>B	A<B	A>B	A>B
GSM706764	gastric cancer	A>B	A>B	A>B	A>B	A>B	A>B
GSM706765	gastric cancer	A>B	A>B	A>B	A>B	A>B	A>B
GSM706766	gastric cancer	A>B	A>B	A>B	A>B	A>B	A>B
GSM706767	gastric cancer	A>B	A>B	A>B	A>B	A>B	A>B
GSM706768	gastric cancer	A>B	A>B	A>B	A>B	A>B	A>B
GSM706769	gastric cancer	A>B	A>B	A>B	A>B	A>B	A>B
GSM706770	gastric cancer	A>B	A>B	A>B	A>B	A>B	A>B
GSM706771	gastric cancer	A>B	A>B	A>B	A>B	A>B	A>B
GSM706772	gastric cancer	A>B	A>B	A>B	A>B	A>B	A<B
GSM706773	gastric cancer	A>B	A>B	A>B	A>B	A>B	A>B
GSM706774	gastric cancer	A>B	A>B	A>B	A>B	A>B	A>B
GSM706775	gastric cancer	A<B	A>B	A>B	A>B	A>B	A>B
GSM706776	gastric cancer	A>B	A>B	A>B	A>B	A>B	A>B
GSM706777	gastric cancer	A>B	A>B	A>B	A>B	A>B	A>B
GSM706778	gastric cancer	A>B	A>B	A>B	A>B	A>B	A>B

[truncated: 1 more sheets: GSE29998]
