# Supplementary material for: A robust qualitative transcriptional signature for the correct pathological diagnosis of gastric cancer
Source: J Transl Med. 2019 Feb 28;17:63. doi: 10.1186/s12967-019-1816-4 (PMC6394047; doi:10.1186/s12967-019-1816-4)
Supplement: Supplementary file 6 — Additional file 6. The REOs of the signature gene pairs. The distributions of REOs of the signature gene pairs in each of the validation datasets. [file 12967_2019_1816_MOESM6_ESM.xls]

## Sheet: GSE5081
Sample	Type	The relative expression orderings of signature gene pairs
		CYR61 VS MMP28(A VS B)	CYR61 VS ACOX1(A VS B)
GSM114504	HP- erosive gastritis	A<B	A<B
GSM114505	HP- erosive gastritis	A<B	A<B
GSM114506	HP- erosive gastritis	A<B	A<B
GSM114507	HP- erosive gastritis	A<B	A<B
GSM114508	HP- erosive gastritis	A<B	A<B
GSM114509	HP- erosive gastritis	A<B	A<B
GSM114510	HP- erosive gastritis	A<B	A<B
GSM114511	HP- erosive gastritis	A<B	A<B
GSM114512	HP+ erosive gastritis	A<B	A<B
GSM114513	HP+ erosive gastritis	A<B	A<B
GSM114514	HP+ erosive gastritis	A<B	A<B
GSM114515	HP+ erosive gastritis	A<B	A<B
GSM114516	HP+ erosive gastritis	A<B	A<B
GSM114517	HP+ erosive gastritis	A<B	A<B
GSM114518	HP+ erosive gastritis	A<B	A<B
GSM114519	HP+ erosive gastritis	A<B	A<B
GSM114520	HP+ erosive gastritis	A<B	A<B
GSM114521	HP+ erosive gastritis	A<B	A<B
GSM114522	HP+ erosive gastritis	A<B	A<B
GSM114523	HP+ erosive gastritis	A<B	A<B
GSM114524	HP+ erosive gastritis	A<B	A<B
GSM114525	HP+ erosive gastritis	A<B	A<B
GSM114526	HP+ erosive gastritis	A<B	A<B
GSM114527	HP+ erosive gastritis	A<B	A<B
GSM114528	HP- erosive gastritis	A<B	A<B
GSM114529	HP- erosive gastritis	A<B	A<B
GSM114530	HP- erosive gastritis	A<B	A<B
GSM114531	HP- erosive gastritis	A<B	A<B
GSM114532	HP- erosive gastritis	A<B	A<B
GSM114533	HP- erosive gastritis	A<B	A<B
GSM114534	HP- erosive gastritis	A<B	A<B
GSM114535	HP- erosive gastritis	A<B	A<B

## Sheet: GSE52138
Sample	Type	The relative expression orderings of signature gene pairs
		CYR61 VS MMP28(A VS B)	CYR61 VS ACOX1(A VS B)
GSM1260196	Tumor	A>B	A>B
GSM1260198	Tumor	A>B	A>B
GSM1260200	Tumor	A>B	A>B
GSM1260201	Tumor	A>B	A>B
GSM1260204	Tumor	A>B	A>B
GSM1260206	tumor_adjacent	A>B	A<B
GSM1260207	Tumor	A<B	A<B
GSM1260208	tumor_adjacent	A>B	A>B
GSM1260209	Tumor	A>B	A<B
GSM1260212	Tumor	A>B	A>B
GSM1260215	tumor_adjacent	A>B	A<B
GSM1260216	Tumor	A>B	A>B
GSM1260219	tumor_adjacent	A<B	A<B
GSM1260220	Tumor	A>B	A>B
GSM1260223	tumor_adjacent	A>B	A<B
GSM1260224	Tumor	A>B	A>B
GSM1260227	tumor_adjacent	A>B	A<B
GSM1260228	Tumor	A>B	A>B
GSM1260231	tumor_adjacent	A>B	A<B
GSM1260232	Tumor	A>B	A>B

## Sheet: GSE29272
Sample	Type	The relative expression orderings of signature gene pairs
		CYR61 VS MMP28(A VS B)	CYR61 VS ACOX1(A VS B)
GSM723464	adjacent-normal	A>B	A>B
GSM723465	Tumor	A>B	A>B
GSM723466	adjacent-normal	A>B	A>B
GSM723467	Tumor	A>B	A>B
GSM723468	adjacent-normal	A>B	A>B
GSM723469	Tumor	A>B	A>B
GSM723470	adjacent-normal	A>B	A>B
GSM723471	Tumor	A>B	A>B
GSM723472	adjacent-normal	A>B	A>B
GSM723473	Tumor	A>B	A>B
GSM723474	adjacent-normal	A>B	A>B
GSM723475	Tumor	A>B	A>B
GSM723476	adjacent-normal	A>B	A>B
GSM723477	Tumor	A>B	A>B
GSM723478	adjacent-normal	A>B	A>B
GSM723479	Tumor	A>B	A>B
GSM723480	adjacent-normal	A>B	A>B
GSM723481	Tumor	A>B	A>B
GSM723482	adjacent-normal	A>B	A>B
GSM723483	Tumor	A>B	A>B
GSM723484	adjacent-normal	A>B	A>B
GSM723485	Tumor	A>B	A>B
GSM723486	adjacent-normal	A>B	A>B
GSM723487	Tumor	A>B	A>B
GSM723488	adjacent-normal	A>B	A>B
GSM723489	Tumor	A>B	A>B
GSM723490	adjacent-normal	A>B	A>B
GSM723491	Tumor	A>B	A>B
GSM723492	adjacent-normal	A>B	A>B
GSM723493	Tumor	A>B	A>B
GSM723494	adjacent-normal	A>B	A>B
GSM723495	Tumor	A>B	A>B
GSM723496	adjacent-normal	A>B	A>B
GSM723497	Tumor	A>B	A>B
GSM723498	adjacent-normal	A>B	A>B
GSM723499	Tumor	A>B	A>B
GSM723500	adjacent-normal	A>B	A>B
GSM723501	Tumor	A>B	A>B
GSM723502	adjacent-normal	A>B	A>B
GSM723503	Tumor	A>B	A>B
GSM723504	adjacent-normal	A>B	A>B
GSM723505	Tumor	A>B	A>B
GSM723506	adjacent-normal	A>B	A>B
GSM723507	Tumor	A>B	A>B
GSM723508	adjacent-normal	A>B	A>B
GSM723509	Tumor	A>B	A>B
GSM723510	adjacent-normal	A>B	A>B
GSM723511	Tumor	A>B	A>B
GSM723512	adjacent-normal	A>B	A>B
GSM723513	Tumor	A>B	A>B
GSM723514	adjacent-normal	A>B	A>B
GSM723515	Tumor	A>B	A>B
GSM723516	adjacent-normal	A>B	A>B
GSM723517	Tumor	A>B	A>B
GSM723518	adjacent-normal	A>B	A>B
GSM723519	Tumor	A>B	A>B
GSM723520	adjacent-normal	A>B	A>B
GSM723521	Tumor	A>B	A>B
GSM723522	adjacent-normal	A>B	A>B
GSM723523	Tumor	A>B	A>B
GSM723524	adjacent-normal	A>B	A>B
GSM723525	Tumor	A>B	A>B
GSM723526	adjacent-normal	A>B	A>B
GSM723527	Tumor	A>B	A>B
GSM723528	adjacent-normal	A>B	A>B
GSM723529	Tumor	A>B	A>B
GSM723530	adjacent-normal	A>B	A>B
GSM723531	Tumor	A>B	A>B
GSM723532	adjacent-normal	A>B	A>B
GSM723533	Tumor	A>B	A>B
GSM723534	adjacent-normal	A>B	A>B
GSM723535	Tumor	A>B	A>B
GSM723536	adjacent-normal	A>B	A>B
GSM723537	Tumor	A>B	A>B
GSM723538	adjacent-normal	A>B	A>B
GSM723539	Tumor	A>B	A>B
GSM723540	adjacent-normal	A>B	A>B
GSM723541	Tumor	A>B	A>B
GSM723542	adjacent-normal	A>B	A>B
GSM723543	Tumor	A>B	A>B
GSM723544	adjacent-normal	A>B	A>B
GSM723545	Tumor	A>B	A>B
GSM723546	adjacent-normal	A>B	A>B
GSM723547	Tumor	A>B	A>B
GSM723548	adjacent-normal	A>B	A>B
GSM723549	Tumor	A>B	A>B
GSM723550	adjacent-normal	A>B	A>B
GSM723551	Tumor	A>B	A>B
GSM723552	adjacent-normal	A>B	A>B
GSM723553	Tumor	A>B	A>B
GSM723554	adjacent-normal	A>B	A>B
GSM723555	Tumor	A>B	A>B
GSM723556	adjacent-normal	A>B	A>B
GSM723557	Tumor	A>B	A>B
GSM723558	adjacent-normal	A>B	A>B
GSM723559	Tumor	A>B	A>B
GSM723560	adjacent-normal	A>B	A>B
GSM723561	Tumor	A>B	A>B
GSM723562	adjacent-normal	A>B	A>B
GSM723563	Tumor	A>B	A>B
GSM723564	adjacent-normal	A>B	A>B
GSM723565	Tumor	A>B	A>B
GSM723566	adjacent-normal	A>B	A>B
GSM723567	Tumor	A>B	A>B
GSM723568	adjacent-normal	A>B	A>B
GSM723569	Tumor	A>B	A>B
GSM723570	adjacent-normal	A>B	A>B
GSM723571	Tumor	A>B	A>B
GSM723572	adjacent-normal	A>B	A>B
GSM723573	Tumor	A>B	A>B
GSM723574	adjacent-normal	A>B	A>B
GSM723575	Tumor	A>B	A>B
GSM723576	adjacent-normal	A>B	A>B
GSM723577	Tumor	A>B	A>B
GSM723578	adjacent-normal	A>B	A>B
GSM723579	Tumor	A>B	A>B
GSM723580	adjacent-normal	A>B	A>B
GSM723581	Tumor	A>B	A>B
GSM723582	adjacent-normal	A>B	A>B
GSM723583	Tumor	A>B	A>B
GSM723584	adjacent-normal	A>B	A>B
GSM723585	Tumor	A>B	A>B
GSM723586	adjacent-normal	A>B	A>B
GSM723587	Tumor	A>B	A>B
GSM723588	adjacent-normal	A>B	A>B
GSM723589	Tumor	A>B	A>B
GSM723590	adjacent-normal	A>B	A>B
GSM723591	Tumor	A>B	A>B
GSM723592	adjacent-normal	A>B	A>B
GSM723593	Tumor	A>B	A>B
GSM723594	adjacent-normal	A>B	A>B
GSM723595	Tumor	A>B	A>B
GSM723596	adjacent-normal	A>B	A>B
GSM723597	Tumor	A>B	A>B
GSM723598	adjacent-normal	A>B	A>B
GSM723599	Tumor	A>B	A>B
GSM723600	adjacent-normal	A>B	A>B
GSM723601	Tumor	A>B	A>B
GSM723602	adjacent-normal	A>B	A>B
GSM723603	Tumor	A>B	A>B
GSM723604	adjacent-normal	A>B	A>B
GSM723605	Tumor	A>B	A>B
GSM723606	adjacent-normal	A>B	A>B
GSM723607	Tumor	A>B	A>B
GSM723608	adjacent-normal	A>B	A>B
GSM723609	Tumor	A>B	A>B
GSM723610	adjacent-normal	A>B	A>B
GSM723611	Tumor	A>B	A>B
GSM723612	adjacent-normal	A>B	A>B
GSM723613	Tumor	A>B	A>B
GSM723614	adjacent-normal	A>B	A>B
GSM723615	Tumor	A>B	A>B
GSM723616	adjacent-normal	A>B	A>B
GSM723617	Tumor	A>B	A>B
GSM723618	adjacent-normal	A>B	A>B
GSM723619	Tumor	A>B	A>B
GSM723620	adjacent-normal	A>B	A>B
GSM723621	Tumor	A>B	A>B
GSM723622	adjacent-normal	A>B	A>B
GSM723623	Tumor	A>B	A>B
GSM723624	adjacent-normal	A>B	A>B
GSM723625	Tumor	A>B	A>B
GSM723626	adjacent-normal	A>B	A>B
GSM723627	Tumor	A>B	A>B
GSM723628	adjacent-normal	A>B	A>B
GSM723629	Tumor	A>B	A>B
GSM723630	adjacent-normal	A>B	A>B
GSM723631	Tumor	A>B	A>B
GSM723632	adjacent-normal	A>B	A>B
GSM723633	Tumor	A>B	A>B
GSM723634	adjacent-normal	A>B	A>B
GSM723635	Tumor	A>B	A>B
GSM723636	adjacent-normal	A>B	A>B
GSM723637	Tumor	A>B	A>B
GSM723638	adjacent-normal	A>B	A>B
GSM723639	Tumor	A>B	A>B
GSM723640	adjacent-normal	A>B	A>B
GSM723641	Tumor	A>B	A>B
GSM723642	adjacent-normal	A>B	A>B
GSM723643	Tumor	A>B	A>B
GSM723644	adjacent-normal	A>B	A>B
GSM723645	Tumor	A>B	A>B
GSM723646	adjacent-normal	A>B	A>B
GSM723647	Tumor	A>B	A>B
GSM723648	adjacent-normal	A>B	A>B
GSM723649	Tumor	A>B	A>B
GSM723650	adjacent-normal	A>B	A>B
GSM723651	Tumor	A>B	A>B
GSM723652	adjacent-normal	A>B	A>B
GSM723653	Tumor	A>B	A>B
GSM723654	adjacent-normal	A>B	A>B
GSM723655	Tumor	A>B	A>B
GSM723656	adjacent-normal	A>B	A>B
GSM723657	Tumor	A>B	A>B
GSM723658	adjacent-normal	A>B	A>B
GSM723659	Tumor	A>B	A>B
GSM723660	adjacent-normal	A>B	A>B
GSM723661	Tumor	A>B	A>B
GSM723662	adjacent-normal	A>B	A>B
GSM723663	Tumor	A>B	A>B
GSM723664	adjacent-normal	A>B	A>B
GSM723665	Tumor	A>B	A>B
GSM723666	adjacent-normal	A>B	A>B
GSM723667	Tumor	A>B	A>B
GSM723668	adjacent-normal	A>B	A>B
GSM723669	Tumor	A>B	A>B
GSM723670	adjacent-normal	A>B	A>B
GSM723671	Tumor	A>B	A>B
GSM723672	adjacent-normal	A>B	A>B
GSM723673	Tumor	A>B	A>B
GSM723674	adjacent-normal	A>B	A>B
GSM723675	Tumor	A>B	A>B
GSM723676	adjacent-normal	A>B	A>B
GSM723677	Tumor	A>B	A>B
GSM723678	adjacent-normal	A>B	A>B
GSM723679	Tumor	A>B	A>B
GSM723680	adjacent-normal	A>B	A>B
GSM723681	Tumor	A>B	A>B
GSM723682	adjacent-normal	A>B	A>B
GSM723683	Tumor	A>B	A>B
GSM723684	adjacent-normal	A>B	A>B
GSM723685	Tumor	A>B	A>B
GSM723686	adjacent-normal	A>B	A>B
GSM723687	Tumor	A>B	A>B
GSM723688	adjacent-normal	A>B	A>B
GSM723689	Tumor	A>B	A>B
GSM723690	adjacent-normal	A>B	A>B
GSM723691	Tumor	A>B	A>B
GSM723692	adjacent-normal	A>B	A>B
GSM723693	Tumor	A>B	A>B
GSM723694	adjacent-normal	A>B	A>B
GSM723695	Tumor	A>B	A>B
GSM723696	adjacent-normal	A>B	A>B
GSM723697	Tumor	A>B	A>B
GSM723698	adjacent-normal	A>B	A>B
GSM723699	Tumor	A>B	A>B
GSM723700	adjacent-normal	A>B	A>B
GSM723701	Tumor	A>B	A>B
GSM723702	adjacent-normal	A>B	A>B
GSM723703	Tumor	A>B	A>B
GSM723704	adjacent-normal	A>B	A>B
GSM723705	Tumor	A>B	A>B
GSM723706	adjacent-normal	A>B	A>B
GSM723707	Tumor	A>B	A>B
GSM723708	adjacent-normal	A>B	A>B
GSM723709	Tumor	A>B	A>B
GSM723710	adjacent-normal	A>B	A>B
GSM723711	Tumor	A>B	A>B
GSM723712	adjacent-normal	A>B	A>B
GSM723713	Tumor	A>B	A>B
GSM723714	adjacent-normal	A>B	A>B
GSM723715	Tumor	A>B	A>B
GSM723716	adjacent-normal	A>B	A>B
GSM723717	Tumor	A>B	A>B
GSM723718	adjacent-normal	A>B	A>B
GSM723719	Tumor	A>B	A>B
GSM723720	adjacent-normal	A>B	A>B
GSM723721	Tumor	A>B	A>B
GSM723722	adjacent-normal	A>B	A>B
GSM723723	Tumor	A>B	A>B
GSM723724	adjacent-normal	A>B	A>B
GSM723725	Tumor	A>B	A>B
GSM723726	adjacent-normal	A>B	A>B
GSM723727	Tumor	A>B	A>B
GSM723728	adjacent-normal	A>B	A>B
GSM723729	Tumor	A>B	A>B
GSM723730	adjacent-normal	A>B	A>B
GSM723731	Tumor	A>B	A>B

## Sheet: GSE34942
Sample	Type	The relative expression orderings of signature gene pairs
		CYR61 VS MMP28(A VS B)	CYR61 VS ACOX1(A VS B)
GSM858082	gastric adenocarcinoma	A>B	A>B
GSM858083	gastric adenocarcinoma	A>B	A>B
GSM858084	gastric adenocarcinoma	A>B	A>B
GSM858085	gastric adenocarcinoma	A>B	A>B
GSM858086	gastric adenocarcinoma	A>B	A>B
GSM858087	gastric adenocarcinoma	A>B	A>B
GSM858088	gastric adenocarcinoma	A>B	A>B
GSM858089	gastric adenocarcinoma	A>B	A>B
GSM858090	gastric adenocarcinoma	A>B	A>B
GSM858091	gastric adenocarcinoma	A>B	A>B
GSM858092	gastric adenocarcinoma	A>B	A>B
GSM858093	gastric adenocarcinoma	A>B	A>B
GSM858094	gastric adenocarcinoma	A>B	A>B
GSM858095	gastric adenocarcinoma	A>B	A>B
GSM858096	gastric adenocarcinoma	A>B	A>B
GSM858097	gastric adenocarcinoma	A>B	A>B
GSM858098	gastric adenocarcinoma	A>B	A>B
GSM858099	gastric adenocarcinoma	A>B	A>B
GSM858100	gastric adenocarcinoma	A>B	A>B
GSM858101	gastric adenocarcinoma	A>B	A>B
GSM858102	gastric adenocarcinoma	A>B	A>B
GSM858103	gastric adenocarcinoma	A>B	A>B
GSM858104	gastric adenocarcinoma	A>B	A>B
GSM858105	gastric adenocarcinoma	A>B	A>B
GSM858106	gastric adenocarcinoma	A>B	A>B
GSM858107	gastric adenocarcinoma	A>B	A>B
GSM858108	gastric adenocarcinoma	A>B	A>B
GSM858109	gastric adenocarcinoma	A>B	A>B
GSM858110	gastric adenocarcinoma	A>B	A>B
GSM858111	gastric adenocarcinoma	A>B	A>B
GSM858112	gastric adenocarcinoma	A>B	A>B
GSM858113	gastric adenocarcinoma	A>B	A>B
GSM858114	gastric adenocarcinoma	A>B	A>B
GSM858115	gastric adenocarcinoma	A>B	A>B
GSM858116	gastric adenocarcinoma	A>B	A>B
GSM858117	gastric adenocarcinoma	A>B	A>B
GSM858118	gastric adenocarcinoma	A>B	A>B
GSM858119	gastric adenocarcinoma	A>B	A>B
GSM858120	gastric adenocarcinoma	A>B	A>B
GSM858121	gastric adenocarcinoma	A>B	A>B
GSM858122	gastric adenocarcinoma	A>B	A>B
GSM858123	gastric adenocarcinoma	A>B	A>B
GSM858124	gastric adenocarcinoma	A>B	A>B
GSM858125	gastric adenocarcinoma	A>B	A>B
GSM858126	gastric adenocarcinoma	A>B	A>B
GSM858127	gastric adenocarcinoma	A>B	A>B
GSM858128	gastric adenocarcinoma	A>B	A>B
GSM858129	gastric adenocarcinoma	A>B	A>B
GSM858130	gastric adenocarcinoma	A>B	A>B
GSM858131	gastric adenocarcinoma	A>B	A>B
GSM858132	gastric adenocarcinoma	A>B	A>B
GSM858133	gastric adenocarcinoma	A>B	A>B
GSM858134	gastric adenocarcinoma	A>B	A>B
GSM858135	gastric adenocarcinoma	A>B	A>B
GSM858136	gastric adenocarcinoma	A>B	A>B
GSM858137	gastric adenocarcinoma	A>B	A>B

## Sheet: GSE22377
Sample	Type	The relative expression orderings of signature gene pairs
		CYR61 VS MMP28(A VS B)	CYR61 VS ACOX1(A VS B)
GSM556676	gastric adenocarcinoma tissue of intestinal type	A>B	A>B
GSM556677	gastric adenocarcinoma tissue of intestinal type	A>B	A>B
GSM556678	gastric adenocarcinoma tissue of intestinal type	A>B	A>B
GSM556679	gastric adenocarcinoma tissue of intestinal type	A>B	A>B
GSM556680	gastric adenocarcinoma tissue of intestinal type	A>B	A>B
GSM556681	gastric adenocarcinoma tissue of intestinal type	A>B	A>B
GSM556682	gastric adenocarcinoma tissue of diffuse type	A>B	A>B
GSM556683	gastric adenocarcinoma tissue of diffuse type	A>B	A>B
GSM556684	gastric adenocarcinoma tissue of intestinal type	A>B	A>B
GSM556685	gastric adenocarcinoma tissue of diffuse type	A>B	A>B
GSM556686	gastric adenocarcinoma tissue of diffuse type	A>B	A>B
GSM556687	gastric adenocarcinoma tissue of diffuse type	A>B	A>B
GSM556688	gastric adenocarcinoma tissue of diffuse type	A>B	A>B
GSM556689	gastric adenocarcinoma tissue of intestinal type	A>B	A>B
GSM556690	gastric adenocarcinoma tissue of intestinal type	A>B	A>B
GSM556691	gastric adenocarcinoma tissue of intestinal type	A>B	A>B
GSM556692	gastric adenocarcinoma tissue of intestinal type	A>B	A>B
GSM556693	gastric adenocarcinoma tissue of diffuse type	A>B	A>B
GSM556694	gastric adenocarcinoma tissue of intestinal type	A>B	A>B
GSM556695	gastric adenocarcinoma tissue of intestinal type	A>B	A>B
GSM556696	gastric adenocarcinoma tissue of intestinal type	A>B	A>B
GSM556697	gastric adenocarcinoma tissue of intestinal type	A>B	A>B
GSM556698	gastric adenocarcinoma tissue of diffuse type	A>B	A>B
GSM556699	gastric adenocarcinoma tissue of diffuse type	A>B	A>B
GSM556700	gastric adenocarcinoma tissue of diffuse type	A>B	A>B
GSM556701	gastric adenocarcinoma tissue of diffuse type	A>B	A>B
GSM556702	gastric adenocarcinoma tissue of intestinal type	A>B	A>B
GSM556703	gastric adenocarcinoma tissue of intestinal type	A>B	A>B
GSM556704	gastric adenocarcinoma tissue of intestinal type	A>B	A>B
GSM556705	gastric adenocarcinoma tissue of diffuse type	A>B	A>B
GSM556706	gastric adenocarcinoma tissue of intestinal type	A>B	A>B
GSM556707	gastric adenocarcinoma tissue of intestinal type	A>B	A>B
GSM556708	gastric adenocarcinoma tissue of diffuse type	A>B	A>B
GSM556709	gastric adenocarcinoma tissue of intestinal type	A>B	A>B
GSM556710	gastric adenocarcinoma tissue of intestinal type	A>B	A>B
GSM556711	gastric adenocarcinoma tissue of diffuse type	A>B	A>B
GSM556712	gastric adenocarcinoma tissue of intestinal type	A>B	A>B
GSM556713	gastric adenocarcinoma tissue of diffuse type	A>B	A>B
GSM556714	gastric adenocarcinoma tissue of diffuse type	A>B	A>B
GSM556715	gastric adenocarcinoma tissue of diffuse type	A>B	A>B
GSM556716	gastric adenocarcinoma tissue of diffuse type	A>B	A>B
GSM556717	gastric adenocarcinoma tissue of diffuse type	A>B	A>B
GSM556718	gastric adenocarcinoma tissue of intestinal type	A>B	A>B

## Sheet: GSE14210
Sample	Type	The relative expression orderings of signature gene pairs
		CYR61 VS MMP28(A VS B)	CYR61 VS ACOX1(A VS B)
GSM355175	Pretreatment endoscopic biopsy samples collected from CF-treated metastatic gastric cancer patients	A>B	A>B
GSM355176	Pretreatment endoscopic biopsy samples collected from CF-treated metastatic gastric cancer patients	A>B	A>B
GSM355177	Pretreatment endoscopic biopsy samples collected from CF-treated metastatic gastric cancer patients	A>B	A>B
GSM355178	Pretreatment endoscopic biopsy samples collected from CF-treated metastatic gastric cancer patients	A>B	A>B
GSM355179	Pretreatment endoscopic biopsy samples collected from CF-treated metastatic gastric cancer patients	A>B	A>B
GSM355180	Pretreatment endoscopic biopsy samples collected from CF-treated metastatic gastric cancer patients	A>B	A>B
GSM355181	Pretreatment endoscopic biopsy samples collected from CF-treated metastatic gastric cancer patients	A>B	A>B
GSM355182	Pretreatment endoscopic biopsy samples collected from CF-treated metastatic gastric cancer patients	A>B	A>B
GSM355183	Pretreatment endoscopic biopsy samples collected from CF-treated metastatic gastric cancer patients	A>B	A>B
GSM355184	Pretreatment endoscopic biopsy samples collected from CF-treated metastatic gastric cancer patients	A>B	A>B
GSM355185	Pretreatment endoscopic biopsy samples collected from CF-treated metastatic gastric cancer patients	A>B	A>B
GSM355186	Pretreatment endoscopic biopsy samples collected from CF-treated metastatic gastric cancer patients	A>B	A>B
GSM355187	Pretreatment endoscopic biopsy samples collected from CF-treated metastatic gastric cancer patients	A>B	A>B
GSM355188	Pretreatment endoscopic biopsy samples collected from CF-treated metastatic gastric cancer patients	A>B	A>B
GSM355189	Pretreatment endoscopic biopsy samples collected from CF-treated metastatic gastric cancer patients	A<B	A<B
GSM355190	Pretreatment endoscopic biopsy samples collected from CF-treated metastatic gastric cancer patients	A>B	A>B
GSM355191	Pretreatment endoscopic biopsy samples collected from CF-treated metastatic gastric cancer patients	A>B	A>B
GSM355192	Pretreatment endoscopic biopsy samples collected from CF-treated metastatic gastric cancer patients	A>B	A>B
GSM355193	Pretreatment endoscopic biopsy samples collected from CF-treated metastatic gastric cancer patients	A>B	A>B
GSM355194	Pretreatment endoscopic biopsy samples collected from CF-treated metastatic gastric cancer patients	A>B	A>B
GSM355195	Pretreatment endoscopic biopsy samples collected from CF-treated metastatic gastric cancer patients	A>B	A>B
GSM355196	Pretreatment endoscopic biopsy samples collected from CF-treated metastatic gastric cancer patients	A>B	A>B
GSM355197	Pretreatment endoscopic biopsy samples collected from CF-treated metastatic gastric cancer patients	A>B	A>B
GSM355198	Pretreatment endoscopic biopsy samples collected from CF-treated metastatic gastric cancer patients	A>B	A>B
GSM355199	Pretreatment endoscopic biopsy samples collected from CF-treated metastatic gastric cancer patients	A>B	A>B
GSM355200	Pretreatment endoscopic biopsy samples collected from CF-treated metastatic gastric cancer patients	A>B	A>B
GSM355201	Pretreatment endoscopic biopsy samples collected from CF-treated metastatic gastric cancer patients	A>B	A>B
GSM355202	Pretreatment endoscopic biopsy samples collected from CF-treated metastatic gastric cancer patients	A>B	A>B
GSM355203	Pretreatment endoscopic biopsy samples collected from CF-treated metastatic gastric cancer patients	A>B	A>B
GSM355204	Pretreatment endoscopic biopsy samples collected from CF-treated metastatic gastric cancer patients	A>B	A>B
GSM355205	Pretreatment endoscopic biopsy samples collected from CF-treated metastatic gastric cancer patients	A>B	A<B
GSM355206	Pretreatment endoscopic biopsy samples collected from CF-treated metastatic gastric cancer patients	A>B	A>B
GSM355207	Pretreatment endoscopic biopsy samples collected from CF-treated metastatic gastric cancer patients	A>B	A>B
GSM355208	Pretreatment endoscopic biopsy samples collected from CF-treated metastatic gastric cancer patients	A>B	A<B
GSM355209	Pretreatment endoscopic biopsy samples collected from CF-treated metastatic gastric cancer patients	A>B	A>B
GSM355210	Pretreatment endoscopic biopsy samples collected from CF-treated metastatic gastric cancer patients	A>B	A>B
GSM355211	Pretreatment endoscopic biopsy samples collected from CF-treated metastatic gastric cancer patients	A>B	A>B
GSM355212	Pretreatment endoscopic biopsy samples collected from CF-treated metastatic gastric cancer patients	A>B	A>B
GSM355213	Pretreatment endoscopic biopsy samples collected from CF-treated metastatic gastric cancer patients	A>B	A>B
GSM355214	Pretreatment endoscopic biopsy samples collected from CF-treated metastatic gastric cancer patients	A>B	A>B
GSM355215	Pretreatment endoscopic biopsy samples collected from CF-treated metastatic gastric cancer patients	A>B	A<B
GSM355216	Pretreatment endoscopic biopsy samples collected from CF-treated metastatic gastric cancer patients	A>B	A>B
GSM355217	Pretreatment endoscopic biopsy samples collected from CF-treated metastatic gastric cancer patients	A>B	A>B
GSM355218	Pretreatment endoscopic biopsy samples collected from CF-treated metastatic gastric cancer patients	A>B	A>B
GSM355219	Pretreatment endoscopic biopsy samples collected from CF-treated metastatic gastric cancer patients	A>B	A>B
GSM355220	Pretreatment endoscopic biopsy samples collected from CF-treated metastatic gastric cancer patients	A>B	A>B
GSM355221	Pretreatment endoscopic biopsy samples collected from CF-treated metastatic gastric cancer patients	A>B	A>B
GSM355222	Pretreatment endoscopic biopsy samples collected from CF-treated metastatic gastric cancer patients	A>B	A>B
GSM355223	Pretreatment endoscopic biopsy samples collected from CF-treated metastatic gastric cancer patients	A>B	A>B
GSM355224	Pretreatment endoscopic biopsy samples collected from CF-treated metastatic gastric cancer patients	A>B	A>B
GSM355225	Pretreatment endoscopic biopsy samples collected from CF-treated metastatic gastric cancer patients	A>B	A>B
GSM355226	Pretreatment endoscopic biopsy samples collected from CF-treated metastatic gastric cancer patients	A>B	A>B
GSM355227	Pretreatment endoscopic biopsy samples collected from CF-treated metastatic gastric cancer patients	A>B	A>B
GSM355228	Pretreatment endoscopic biopsy samples collected from CF-treated metastatic gastric cancer patients	A>B	A<B
GSM355229	Pretreatment endoscopic biopsy samples collected from CF-treated metastatic gastric cancer patients	A>B	A>B
GSM355230	Pretreatment endoscopic biopsy samples collected from CF-treated metastatic gastric cancer patients	A>B	A>B
GSM355231	Pretreatment endoscopic biopsy samples collected from CF-treated metastatic gastric cancer patients	A>B	A>B
GSM355232	Pretreatment endoscopic biopsy samples collected from CF-treated metastatic gastric cancer patients	A>B	A>B
GSM355233	Pretreatment endoscopic biopsy samples collected from CF-treated metastatic gastric cancer patients	A<B	A<B
GSM355234	Pretreatment endoscopic biopsy samples collected from CF-treated metastatic gastric cancer patients	A>B	A>B
GSM355235	Pretreatment endoscopic biopsy samples collected from CF-treated metastatic gastric cancer patients	A>B	A>B
GSM355236	Pretreatment endoscopic biopsy samples collected from CF-treated metastatic gastric cancer patients	A>B	A>B
GSM355237	Pretreatment endoscopic biopsy samples collected from CF-treated metastatic gastric cancer patients	A>B	A>B
GSM355238	Pretreatment endoscopic biopsy samples collected from CF-treated metastatic gastric cancer patients	A>B	A>B
GSM355239	Pretreatment endoscopic biopsy samples collected from CF-treated metastatic gastric cancer patients	A>B	A>B
GSM355240	Pretreatment endoscopic biopsy samples collected from CF-treated metastatic gastric cancer patients	A>B	A>B
GSM355241	Pretreatment endoscopic biopsy samples collected from CF-treated metastatic gastric cancer patients	A>B	A<B
GSM355242	Pretreatment endoscopic biopsy samples collected from CF-treated metastatic gastric cancer patients	A>B	A>B
GSM355243	Pretreatment endoscopic biopsy samples collected from CF-treated metastatic gastric cancer patients	A>B	A>B
GSM355244	Pretreatment endoscopic biopsy samples collected from CF-treated metastatic gastric cancer patients	A>B	A>B
GSM355245	Pretreatment endoscopic biopsy samples collected from CF-treated metastatic gastric cancer patients	A>B	A>B
GSM355246	Pretreatment endoscopic biopsy samples collected from CF-treated metastatic gastric cancer patients	A>B	A>B
GSM355247	Pretreatment endoscopic biopsy samples collected from CF-treated metastatic gastric cancer patients	A>B	A>B
GSM355248	Pretreatment endoscopic biopsy samples collected from CF-treated metastatic gastric cancer patients	A>B	A>B
GSM355249	Pretreatment endoscopic biopsy samples collected from CF-treated metastatic gastric cancer patients	A>B	A>B
GSM355250	Pretreatment endoscopic biopsy samples collected from CF-treated metastatic gastric cancer patients	A>B	A>B
GSM355251	Pretreatment endoscopic biopsy samples collected from CF-treated metastatic gastric cancer patients	A>B	A>B
GSM355252	Pretreatment endoscopic biopsy samples collected from CF-treated metastatic gastric cancer patients	A>B	A>B
GSM355253	Pretreatment endoscopic biopsy samples collected from CF-treated metastatic gastric cancer patients	A>B	A>B
GSM355254	Pretreatment endoscopic biopsy samples collected from CF-treated metastatic gastric cancer patients	A>B	A>B
GSM355255	Pretreatment endoscopic biopsy samples collected from CF-treated metastatic gastric cancer patients	A>B	A>B
GSM355256	Pretreatment endoscopic biopsy samples collected from CF-treated metastatic gastric cancer patients	A>B	A>B
GSM355257	Pretreatment endoscopic biopsy samples collected from CF-treated metastatic gastric cancer patients	A>B	A>B
GSM355258	Pretreatment endoscopic biopsy samples collected from CF-treated metastatic gastric cancer patients	A>B	A<B
GSM355259	Pretreatment endoscopic biopsy samples collected from CF-treated metastatic gastric cancer patients	A>B	A>B
GSM355260	Pretreatment endoscopic biopsy samples collected from CF-treated metastatic gastric cancer patients	A>B	A>B
GSM355261	Pretreatment endoscopic biopsy samples collected from CF-treated metastatic gastric cancer patients	A>B	A>B
GSM355262	Pretreatment endoscopic biopsy samples collected from CF-treated metastatic gastric cancer patients	A>B	A>B
GSM355263	Pretreatment endoscopic biopsy samples collected from CF-treated metastatic gastric cancer patients	A>B	A>B
GSM355264	Pretreatment endoscopic biopsy samples collected from CF-treated metastatic gastric cancer patients	A>B	A>B
GSM355265	Pretreatment endoscopic biopsy samples collected from CF-treated metastatic gastric cancer patients	A>B	A>B
GSM355266	Pretreatment endoscopic biopsy samples collected from CF-treated metastatic gastric cancer patients	A>B	A>B
GSM355267	Pretreatment endoscopic biopsy samples collected from CF-treated metastatic gastric cancer patients	A>B	A>B
GSM355268	Pretreatment endoscopic biopsy samples collected from CF-treated metastatic gastric cancer patients	A>B	A>B
GSM355269	Pretreatment endoscopic biopsy samples collected from CF-treated metastatic gastric cancer patients	A>B	A>B
GSM355270	Pretreatment endoscopic biopsy samples collected from CF-treated metastatic gastric cancer patients	A>B	A>B
GSM355271	Pretreatment endoscopic biopsy samples collected from CF-treated metastatic gastric cancer patients	A>B	A>B
GSM355272	Pretreatment endoscopic biopsy samples collected from CF-treated metastatic gastric cancer patients	A>B	A>B
GSM355273	Pretreatment endoscopic biopsy samples collected from CF-treated metastatic gastric cancer patients	A>B	A>B
GSM355274	Pretreatment endoscopic biopsy samples collected from CF-treated metastatic gastric cancer patients	A>B	A>B
GSM355275	Pretreatment endoscopic biopsy samples collected from CF-treated metastatic gastric cancer patients	A>B	A>B
GSM355276	Pretreatment endoscopic biopsy samples collected from CF-treated metastatic gastric cancer patients	A>B	A>B
GSM355277	Pretreatment endoscopic biopsy samples collected from CF-treated metastatic gastric cancer patients	A>B	A>B
GSM355278	Pretreatment endoscopic biopsy samples collected from CF-treated metastatic gastric cancer patients	A>B	A>B
GSM355279	Pretreatment endoscopic biopsy samples collected from CF-treated metastatic gastric cancer patients	A>B	A>B
GSM355280	Pretreatment endoscopic biopsy samples collected from CF-treated metastatic gastric cancer patients	A<B	A<B
GSM355281	Pretreatment endoscopic biopsy samples collected from CF-treated metastatic gastric cancer patients	A>B	A>B
GSM355282	Pretreatment endoscopic biopsy samples collected from CF-treated metastatic gastric cancer patients	A>B	A>B
GSM355283	Pretreatment endoscopic biopsy samples collected from CF-treated metastatic gastric cancer patients	A>B	A>B
GSM355284	Pretreatment endoscopic biopsy samples collected from CF-treated metastatic gastric cancer patients	A>B	A>B
GSM355285	Pretreatment endoscopic biopsy samples collected from CF-treated metastatic gastric cancer patients	A>B	A>B
GSM355286	Pretreatment endoscopic biopsy samples collected from CF-treated metastatic gastric cancer patients	A>B	A>B
GSM355287	Pretreatment endoscopic biopsy samples collected from CF-treated metastatic gastric cancer patients	A>B	A>B
GSM355288	Pretreatment endoscopic biopsy samples collected from CF-treated metastatic gastric cancer patients	A>B	A>B
GSM355289	Pretreatment endoscopic biopsy samples collected from CF-treated metastatic gastric cancer patients	A>B	A>B
GSM355290	Pretreatment endoscopic biopsy samples collected from CF-treated metastatic gastric cancer patients	A>B	A<B
GSM355291	Pretreatment endoscopic biopsy samples collected from CF-treated metastatic gastric cancer patients	A>B	A>B
GSM355292	Pretreatment endoscopic biopsy samples collected from CF-treated metastatic gastric cancer patients	A>B	A>B
GSM355293	Pretreatment endoscopic biopsy samples collected from CF-treated metastatic gastric cancer patients	A>B	A>B
GSM355294	Pretreatment endoscopic biopsy samples collected from CF-treated metastatic gastric cancer patients	A>B	A>B
GSM355295	Pretreatment endoscopic biopsy samples collected from CF-treated metastatic gastric cancer patients	A>B	A>B
GSM355296	Pretreatment endoscopic biopsy samples collected from CF-treated metastatic gastric cancer patients	A>B	A>B
GSM355297	Pretreatment endoscopic biopsy samples collected from CF-treated metastatic gastric cancer patients	A>B	A>B
GSE355320	Pretreatment endoscopic biopsy samples collected from CF-treated metastatic gastric cancer patients	A>B	A>B
GSE355321	Pretreatment endoscopic biopsy samples collected from CF-treated metastatic gastric cancer patients	A>B	A>B
GSE355322	Pretreatment endoscopic biopsy samples collected from CF-treated metastatic gastric cancer patients	A>B	A>B
GSE355323	Pretreatment endoscopic biopsy samples collected from CF-treated metastatic gastric cancer patients	A>B	A>B
GSE355324	Pretreatment endoscopic biopsy samples collected from CF-treated metastatic gastric cancer patients	A>B	A>B
GSE355325	Pretreatment endoscopic biopsy samples collected from CF-treated metastatic gastric cancer patients	A<B	A>B
GSE355326	Pretreatment endoscopic biopsy samples collected from CF-treated metastatic gastric cancer patients	A>B	A>B
GSE355327	Pretreatment endoscopic biopsy samples collected from CF-treated metastatic gastric cancer patients	A<B	A<B
GSE355328	Pretreatment endoscopic biopsy samples collected from CF-treated metastatic gastric cancer patients	A>B	A>B
GSE355329	Pretreatment endoscopic biopsy samples collected from CF-treated metastatic gastric cancer patients	A>B	A>B
GSE355330	Pretreatment endoscopic biopsy samples collected from CF-treated metastatic gastric cancer patients	A>B	A>B
GSE355331	Pretreatment endoscopic biopsy samples collected from CF-treated metastatic gastric cancer patients	A>B	A>B
GSE355332	Pretreatment endoscopic biopsy samples collected from CF-treated metastatic gastric cancer patients	A>B	A>B
GSE355333	Pretreatment endoscopic biopsy samples collected from CF-treated metastatic gastric cancer patients	A>B	A>B
GSE355334	Pretreatment endoscopic biopsy samples collected from CF-treated metastatic gastric cancer patients	A>B	A>B
GSE355335	Pretreatment endoscopic biopsy samples collected from CF-treated metastatic gastric cancer patients	A>B	A>B
GSE355336	Pretreatment endoscopic biopsy samples collected from CF-treated metastatic gastric cancer patients	A>B	A>B
GSE355337	Pretreatment endoscopic biopsy samples collected from CF-treated metastatic gastric cancer patients	A>B	A>B
GSE355338	Pretreatment endoscopic biopsy samples collected from CF-treated metastatic gastric cancer patients	A>B	A>B
GSE355339	Pretreatment endoscopic biopsy samples collected from CF-treated metastatic gastric cancer patients	A<B	A>B
GSE355340	Pretreatment endoscopic biopsy samples collected from CF-treated metastatic gastric cancer patients	A>B	A>B
GSE355341	Pretreatment endoscopic biopsy samples collected from CF-treated metastatic gastric cancer patients	A>B	A>B

## Sheet: GSE13861
Sample	Type	The relative expression orderings of signature gene pairs
		CYR61 VS MMP28(A VS B)	CYR61 VS ACOX1(A VS B)
GSM348332	Adjacent-normal	A>B	A>B
GSM348333	Adjacent-normal	A>B	A>B
GSM348334	Adjacent-normal	A>B	A>B
GSM348335	Adjacent-normal	A>B	A>B
GSM348336	Adjacent-normal	A>B	A>B
GSM348337	Adjacent-normal	A<B	A<B
GSM348338	Adjacent-normal	A>B	A>B
GSM348339	Adjacent-normal	A>B	A>B
GSM348340	Adjacent-normal	A>B	A>B
GSM348341	Adjacent-normal	A>B	A>B
GSM348342	Adjacent-normal	A>B	A>B
GSM348343	Adjacent-normal	A>B	A>B
GSM348344	Adjacent-normal	A>B	A>B
GSM348345	Adjacent-normal	A>B	A>B
GSM348346	Adjacent-normal	A>B	A>B
GSM348347	Adjacent-normal	A>B	A>B
GSM348348	Adjacent-normal	A>B	A>B
GSM348349	Adjacent-normal	A>B	A>B
GSM348350	Adjacent-normal	A>B	A>B
GSM348351	gastric adenocarcinoma	A>B	A>B
GSM348352	gastric adenocarcinoma	A>B	A>B
GSM348353	gastric adenocarcinoma	A>B	A>B
GSM348354	gastric adenocarcinoma	A>B	A>B
GSM348355	gastric adenocarcinoma	A>B	A>B
GSM348356	gastric adenocarcinoma	A>B	A>B
GSM348357	gastric adenocarcinoma	A>B	A>B
GSM348360	gastric adenocarcinoma	A>B	A>B
GSM348361	gastric adenocarcinoma	A>B	A>B
GSM348362	gastric adenocarcinoma	A>B	A>B
GSM348363	gastric adenocarcinoma	A>B	A>B
GSM348364	gastric adenocarcinoma	A>B	A>B
GSM348365	gastric adenocarcinoma	A>B	A>B
GSM348366	gastric adenocarcinoma	A>B	A>B
GSM348367	gastric adenocarcinoma	A>B	A>B
GSM348368	gastric adenocarcinoma	A>B	A>B
GSM348369	gastric adenocarcinoma	A>B	A>B
GSM348370	gastric adenocarcinoma	A>B	A>B
GSM348371	gastric adenocarcinoma	A>B	A>B
GSM348372	gastric adenocarcinoma	A>B	A>B
GSM348373	gastric adenocarcinoma	A>B	A>B
GSM348375	gastric adenocarcinoma	A>B	A>B
GSM348376	gastric adenocarcinoma	A>B	A>B
GSM348377	gastric adenocarcinoma	A>B	A>B
GSM348378	gastric adenocarcinoma	A>B	A>B
GSM348379	gastric adenocarcinoma	A>B	A>B
GSM348380	gastric adenocarcinoma	A>B	A>B
GSM348381	gastric adenocarcinoma	A>B	A>B
GSM348382	gastric adenocarcinoma	A<B	A>B
GSM348383	gastric adenocarcinoma	A>B	A>B
GSM348384	gastric adenocarcinoma	A>B	A>B
GSM348385	gastric adenocarcinoma	A>B	A>B
GSM348386	gastric adenocarcinoma	A>B	A>B
GSM348387	gastric adenocarcinoma	A>B	A>B
GSM348388	gastric adenocarcinoma	A>B	A>B
GSM348389	gastric adenocarcinoma	A>B	A>B
GSM348390	gastric adenocarcinoma	A>B	A>B
GSM348391	gastric adenocarcinoma	A>B	A>B
GSM348392	gastric adenocarcinoma	A>B	A>B
GSM348393	gastric adenocarcinoma	A>B	A>B
GSM348394	gastric adenocarcinoma	A>B	A>B
GSM348395	gastric adenocarcinoma	A>B	A>B
GSM348396	gastric adenocarcinoma	A>B	A>B
GSM348397	gastric adenocarcinoma	A>B	A>B
GSM348398	gastric adenocarcinoma	A>B	A>B
GSM348399	gastric adenocarcinoma	A>B	A>B
GSM348400	gastric adenocarcinoma	A>B	A>B
GSM348401	gastric adenocarcinoma	A>B	A>B
GSM348403	gastric adenocarcinoma	A>B	A>B
GSM348405	gastric adenocarcinoma	A>B	A>B
GSM348406	gastric adenocarcinoma	A>B	A>B
GSM348407	gastric adenocarcinoma	A>B	A>B
GSM348408	gastric adenocarcinoma	A>B	A>B
GSM348409	gastric adenocarcinoma	A>B	A>B
GSM348410	gastric adenocarcinoma	A>B	A>B
GSM348411	gastric adenocarcinoma	A>B	A>B
GSM348412	gastric adenocarcinoma	A>B	A>B
GSM348413	gastric adenocarcinoma	A>B	A>B
GSM348414	gastric adenocarcinoma	A>B	A>B
GSM348415	gastric adenocarcinoma	A>B	A>B
GSM348416	gastric adenocarcinoma	A>B	A>B
GSM348418	gastric adenocarcinoma	A>B	A>B
GSM348419	gastric adenocarcinoma	A>B	A>B
GSM348420	gastric adenocarcinoma	A>B	A>B
GSM348421	gastric adenocarcinoma	A<B	A>B

## Sheet: GSE38024
Sample	Type	The relative expression orderings of signature gene pairs
		CYR61 VS MMP28(A VS B)	CYR61 VS ACOX1(A VS B)
GSM932442	gastric adenocarcinoma	A>B	A>B
GSM932443	gastric adenocarcinoma	A>B	A>B
GSM932444	gastric adenocarcinoma	A>B	A>B
GSM932445	gastric adenocarcinoma	A>B	A>B
GSM932446	gastric adenocarcinoma	A>B	A>B
GSM932447	gastric adenocarcinoma	A>B	A>B
GSM932448	gastric adenocarcinoma	A>B	A>B
GSM932449	gastric adenocarcinoma	A>B	A>B
GSM932450	gastric adenocarcinoma	A>B	A>B
GSM932451	gastric adenocarcinoma	A>B	A>B
GSM932452	gastric adenocarcinoma	A>B	A>B
GSM932453	gastric adenocarcinoma	A>B	A>B
GSM932454	gastric adenocarcinoma	A>B	A>B
GSM932455	gastric adenocarcinoma	A>B	A>B
GSM932456	gastric adenocarcinoma	A>B	A>B
GSM932457	gastric adenocarcinoma	A>B	A>B
GSM932458	gastric adenocarcinoma	A>B	A>B
GSM932459	gastric adenocarcinoma	A>B	A>B
GSM932460	gastric adenocarcinoma	A>B	A>B
GSM932461	gastric adenocarcinoma	A>B	A>B
GSM932462	gastric adenocarcinoma	A>B	A>B
GSM932463	gastric adenocarcinoma	A>B	A>B
GSM932464	gastric adenocarcinoma	A>B	A>B
GSM932465	gastric adenocarcinoma	A>B	A>B
GSM932466	gastric adenocarcinoma	A>B	A>B
GSM932467	gastric adenocarcinoma	A>B	A>B
GSM932468	gastric adenocarcinoma	A>B	A>B
GSM932469	gastric adenocarcinoma	A>B	A>B
GSM932470	gastric adenocarcinoma	A>B	A>B
GSM932471	gastric adenocarcinoma	A<B	A>B
GSM932472	gastric adenocarcinoma	A>B	A>B
GSM932473	gastric adenocarcinoma	A>B	A>B
GSM932474	gastric adenocarcinoma	A<B	A>B
GSM932475	gastric adenocarcinoma	A<B	A>B
GSM932476	gastric adenocarcinoma	A>B	A>B
GSM932477	gastric adenocarcinoma	A>B	A>B
GSM932478	gastric adenocarcinoma	A>B	A>B
GSM932479	gastric adenocarcinoma	A>B	A>B
GSM932480	gastric adenocarcinoma	A>B	A>B
GSM932481	gastric adenocarcinoma	A<B	A<B
GSM932482	gastric adenocarcinoma	A>B	A>B
GSM932483	gastric adenocarcinoma	A>B	A>B
GSM932484	gastric adenocarcinoma	A>B	A>B
GSM932485	gastric adenocarcinoma	A>B	A>B
GSM932486	gastric adenocarcinoma	A>B	A>B
GSM932487	gastric adenocarcinoma	A>B	A>B
GSM932488	gastric adenocarcinoma	A>B	A>B
GSM932489	gastric adenocarcinoma	A>B	A>B

## Sheet: GSE26899
Sample	Type	The relative expression orderings of signature gene pairs
		CYR61 VS MMP28(A VS B)	CYR61 VS ACOX1(A VS B)
GSM662374	Gastric cancer	A>B	A>B
GSM662375	Adjacent-normal	A>B	A>B
GSM662376	Gastric cancer	A<B	A>B
GSM662377	Gastric cancer	A>B	A>B
GSM662378	Gastric cancer	A>B	A>B
GSM662379	Adjacent-normal	A>B	A>B
GSM662380	Adjacent-normal	A>B	A>B
GSM662381	Adjacent-normal	A>B	A>B
GSM662382	Gastric cancer	A>B	A>B
GSM662383	Adjacent-normal	A>B	A>B
GSM662384	Adjacent-normal	A>B	A>B
GSM662385	Gastric cancer	A>B	A>B
GSM662386	Gastric cancer	A>B	A>B
GSM662387	Adjacent-normal	A>B	A>B
GSM662388	Adjacent-normal	A>B	A>B
GSM662389	Gastric cancer	A>B	A>B
GSM662390	Gastric cancer	A>B	A>B
GSM662391	Adjacent-normal	A>B	A>B
GSM662392	Adjacent-normal	A>B	A>B
GSM662393	Adjacent-normal	A>B	A>B
GSM662394	Gastric cancer	A>B	A>B
GSM662395	Gastric cancer	A>B	A>B
GSM662396	Gastric cancer	A>B	A>B
GSM662397	Gastric cancer	A>B	A>B
GSM662398	Gastric cancer	A>B	A>B
GSM662399	Gastric cancer	A>B	A>B
GSM662400	Gastric cancer	A>B	A>B
GSM662401	Gastric cancer	A>B	A>B
GSM662402	Adjacent-normal	A>B	A>B
GSM662403	Gastric cancer	A>B	A>B
GSM662404	Gastric cancer	A>B	A>B
GSM662405	Gastric cancer	A>B	A>B
GSM662406	Gastric cancer	A>B	A>B
GSM662407	Gastric cancer	A>B	A>B
GSM662408	Gastric cancer	A>B	A>B
GSM662409	Gastric cancer	A>B	A>B
GSM662410	Gastric cancer	A>B	A>B
GSM662411	Gastric cancer	A>B	A>B
GSM662412	Gastric cancer	A>B	A>B
GSM662413	Gastric cancer	A>B	A>B
GSM662414	Gastric cancer	A>B	A>B
GSM662415	Gastric cancer	A>B	A>B
GSM662416	Gastric cancer	A>B	A>B
GSM662417	Gastric cancer	A>B	A>B
GSM662418	Gastric cancer	A>B	A>B
GSM662419	Gastric cancer	A>B	A>B
GSM662420	Gastric cancer	A>B	A>B
GSM662421	Gastric cancer	A>B	A>B
GSM662422	Gastric cancer	A>B	A>B
GSM662423	Gastric cancer	A>B	A>B
GSM662424	Gastric cancer	A>B	A>B
GSM662425	Gastric cancer	A>B	A>B
GSM662426	Gastric cancer	A>B	A>B
GSM662427	Gastric cancer	A>B	A>B
GSM662428	Gastric cancer	A>B	A>B
GSM662429	Gastric cancer	A>B	A>B
GSM662430	Gastric cancer	A>B	A>B
GSM662431	Gastric cancer	A>B	A>B
GSM662432	Gastric cancer	A>B	A>B
GSM662433	Gastric cancer	A>B	A>B
GSM662434	Gastric cancer	A>B	A>B
GSM662435	Gastric cancer	A>B	A>B
GSM662436	Gastric cancer	A>B	A>B
GSM662437	Gastric cancer	A>B	A>B
GSM662438	Gastric cancer	A>B	A>B
GSM662439	Gastric cancer	A>B	A>B
GSM662440	Gastric cancer	A>B	A>B
GSM662441	Gastric cancer	A>B	A>B
GSM662442	Gastric cancer	A<B	A>B
GSM662443	Gastric cancer	A>B	A>B
GSM662444	Gastric cancer	A>B	A>B
GSM662445	Gastric cancer	A>B	A>B
GSM662446	Gastric cancer	A>B	A>B
GSM662447	Gastric cancer	A>B	A>B
GSM662448	Gastric cancer	A>B	A>B
GSM662449	Gastric cancer	A>B	A>B
GSM662450	Gastric cancer	A>B	A>B
GSM662451	Gastric cancer	A>B	A>B
GSM662452	Gastric cancer	A>B	A>B
GSM662453	Gastric cancer	A>B	A>B
GSM662454	Gastric cancer	A>B	A>B
GSM662455	Gastric cancer	A>B	A>B
GSM662456	Gastric cancer	A>B	A>B
GSM662457	Gastric cancer	A>B	A>B
GSM662458	Gastric cancer	A>B	A>B
GSM662459	Gastric cancer	A>B	A>B
GSM662460	Gastric cancer	A<B	A>B
GSM662461	Gastric cancer	A>B	A>B
GSM662462	Gastric cancer	A>B	A>B
GSM662463	Gastric cancer	A>B	A>B
GSM662464	Gastric cancer	A>B	A>B
GSM662465	Gastric cancer	A>B	A>B
GSM662466	Gastric cancer	A>B	A>B
GSM662467	Gastric cancer	A>B	A>B
GSM662468	Gastric cancer	A>B	A>B
GSM662469	Gastric cancer	A>B	A>B
GSM662470	Gastric cancer	A>B	A>B
GSM662471	Gastric cancer	A>B	A>B
GSM662472	Gastric cancer	A>B	A>B
GSM662473	Gastric cancer	A>B	A>B
GSM662474	Gastric cancer	A>B	A>B
GSM662475	Gastric cancer	A>B	A>B
GSM662476	Gastric cancer	A>B	A>B
GSM662477	Gastric cancer	A>B	A>B
GSM662478	Gastric cancer	A>B	A>B
GSM662479	Gastric cancer	A>B	A>B
GSM662480	Gastric cancer	A>B	A>B
GSM662481	Gastric cancer	A>B	A>B

## Sheet: TCGA
Sample	Type	The relative expression orderings of signature gene pairs
		CYR61 VS MMP28(A VS B)	CYR61 VS ACOX1(A VS B)
TCGA-BR-8369-01A-11R-2343-13	Primary Tumor	A>B	A>B
TCGA-HU-A4G9-01A-11R-A24K-31	Primary Tumor	A<B	A<B
TCGA-CG-5732-01A-11R-1602-13	Primary Tumor	A>B	A>B
TCGA-CD-5798-01A-11R-1602-13	Primary Tumor	A>B	A>B
TCGA-BR-6709-01A-11R-1884-13	Primary Tumor	A>B	A>B
TCGA-VQ-A8PD-01A-11R-A414-31	Primary Tumor	A>B	A>B
TCGA-B7-5818-01A-11R-1602-13	Primary Tumor	A>B	A>B
TCGA-CG-4462-01A-01R-1157-13	Primary Tumor	A>B	A>B
TCGA-F1-6177-01A-11R-1802-13	Primary Tumor	A>B	A>B
TCGA-VQ-A925-01A-11R-A414-31	Primary Tumor	A<B	A<B
TCGA-VQ-A94P-01A-13R-A414-31	Primary Tumor	A>B	A>B
TCGA-BR-6852-01A-11R-1884-13	Primary Tumor	A>B	A>B
TCGA-IN-A7NR-01A-11R-A354-31	Primary Tumor	A>B	A>B
TCGA-BR-8679-01A-11R-2402-13	Primary Tumor	A>B	A>B
TCGA-BR-6565-01A-11R-1802-13	Primary Tumor	A>B	A>B
TCGA-CG-4460-01A-01R-1157-13	Primary Tumor	A>B	A<B
TCGA-VQ-A91X-01A-12R-A414-31	Primary Tumor	A>B	A<B
TCGA-VQ-A8DZ-01A-11R-A36D-31	Primary Tumor	A>B	A>B
TCGA-VQ-A8E2-01A-11R-A36D-31	Primary Tumor	A>B	A>B
TCGA-IN-8663-01A-11R-2402-13	Primary Tumor	A>B	A>B
TCGA-IN-8462-01A-11R-2343-13	Primary Tumor	A>B	A>B
TCGA-RD-A7BS-01A-11R-A32D-31	Primary Tumor	A>B	A>B
TCGA-BR-4191-01A-02R-1131-13	Primary Tumor	A>B	A>B
TCGA-D7-6522-01A-11R-1802-13	Primary Tumor	A>B	A>B
TCGA-BR-6563-01A-13R-2055-13	Primary Tumor	A>B	A>B
TCGA-BR-8683-01A-11R-2402-13	Primary Tumor	A>B	A>B
TCGA-R5-A7ZI-01A-11R-A354-31	Primary Tumor	A>B	A>B
TCGA-BR-8686-01A-11R-2402-13	Primary Tumor	A>B	A>B
TCGA-BR-4367-01A-01R-1157-13	Primary Tumor	A>B	A>B
TCGA-CD-A486-01A-11R-A24K-31	Primary Tumor	A>B	A>B
TCGA-VQ-A8P3-01A-11R-A36D-31	Primary Tumor	A>B	A>B
TCGA-BR-4256-01A-01R-1131-13	Primary Tumor	A>B	A>B
TCGA-BR-8372-01A-11R-2343-13	Primary Tumor	A>B	A>B
TCGA-BR-8366-01A-11R-2343-13	Primary Tumor	A>B	A>B
TCGA-BR-8291-01A-11R-2343-13	Primary Tumor	A>B	A>B
TCGA-IN-7808-01A-11R-2203-13	Primary Tumor	A>B	A>B
TCGA-BR-8297-01A-12R-2343-13	Primary Tumor	A>B	A>B
TCGA-VQ-A8PK-01A-12R-A414-31	Primary Tumor	A>B	A>B
TCGA-D7-6822-01A-11R-1884-13	Primary Tumor	A>B	A>B
TCGA-BR-8058-01A-31R-2343-13	Primary Tumor	A>B	A>B
TCGA-IN-A6RS-01A-12R-A354-31	Primary Tumor	A>B	A>B
TCGA-HU-8238-01A-11R-2343-13	Primary Tumor	A>B	A>B
TCGA-BR-7717-01A-11R-2055-13	Primary Tumor	A>B	A>B
TCGA-VQ-A8PP-01A-21R-A414-31	Primary Tumor	A>B	A>B
TCGA-HJ-7597-01A-21R-2203-13	Primary Tumor	A<B	A<B
TCGA-VQ-A8P8-01A-11R-A39E-31	Primary Tumor	A<B	A<B
TCGA-CD-A487-01A-21R-A24K-31	Primary Tumor	A>B	A>B
TCGA-FP-A4BF-01A-12R-A36D-31	Primary Tumor	A>B	A>B
TCGA-D7-A6EX-01A-11R-A31P-31	Primary Tumor	A>B	A>B
TCGA-HU-A4H4-01A-21R-A251-31	Primary Tumor	A>B	A>B
TCGA-VQ-A8DT-01A-11R-A36D-31	Primary Tumor	A>B	A>B
TCGA-HU-A4GF-01A-11R-A24K-31	Primary Tumor	A>B	A>B
TCGA-BR-8367-01A-11R-2343-13	Primary Tumor	A>B	A>B
TCGA-BR-7901-01A-11R-2203-13	Primary Tumor	A>B	A>B
TCGA-BR-6707-01A-11R-1884-13	Primary Tumor	A>B	A>B
TCGA-HU-A4H5-01A-21R-A251-31	Primary Tumor	A>B	A<B
TCGA-MX-A666-01A-11R-A31P-31	Primary Tumor	A>B	A<B
TCGA-BR-8682-01A-11R-2402-13	Primary Tumor	A>B	A<B
TCGA-CG-4436-01A-01R-1157-13	Primary Tumor	A>B	A>B
TCGA-D7-A6F2-01A-12R-A31P-31	Primary Tumor	A>B	A>B
TCGA-HU-A4H8-01A-11R-A251-31	Primary Tumor	A>B	A<B
TCGA-BR-6455-01A-11R-1802-13	Primary Tumor	A>B	A>B
TCGA-VQ-A8P5-01A-11R-A39E-31	Primary Tumor	A>B	A>B
TCGA-BR-8486-01A-31R-2402-13	Primary Tumor	A>B	A>B
TCGA-CG-4444-01A-01R-1157-13	Primary Tumor	A>B	A>B
TCGA-BR-A4CS-01A-11R-A24K-31	Primary Tumor	A>B	A>B
TCGA-FP-A8CX-01A-11R-A36D-31	Primary Tumor	A>B	A>B
TCGA-VQ-AA6D-01A-11R-A414-31	Primary Tumor	A>B	A>B
TCGA-VQ-A91U-01A-11R-A414-31	Primary Tumor	A>B	A>B
TCGA-ZQ-A9CR-01A-11R-A39E-31	Primary Tumor	A>B	A>B
TCGA-D7-A4Z0-01A-22R-A251-31	Primary Tumor	A>B	A>B
TCGA-BR-A4J5-01A-21R-A251-31	Primary Tumor	A>B	A>B
TCGA-BR-4361-01A-01R-1157-13	Primary Tumor	A>B	A>B
TCGA-BR-7196-01A-11R-2055-13	Primary Tumor	A>B	A>B
TCGA-CG-4469-01A-01R-1157-13	Primary Tumor	A>B	A<B
TCGA-BR-6452-01A-12R-1802-13	Primary Tumor	A>B	A>B
TCGA-HU-A4GD-01A-11R-A36D-31	Primary Tumor	A>B	A>B
TCGA-RD-A8N2-01A-12R-A36D-31	Primary Tumor	A>B	A>B
TCGA-RD-A8N6-01A-11R-A36D-31	Primary Tumor	A>B	A>B
TCGA-BR-7715-01A-11R-2055-13	Primary Tumor	A>B	A>B
TCGA-D7-6521-01A-11R-1802-13	Primary Tumor	A>B	A>B
TCGA-D7-A6EV-01A-11R-A31P-31	Primary Tumor	A>B	A<B
TCGA-BR-4187-01A-01R-1131-13	Primary Tumor	A>B	A>B
TCGA-BR-A4J9-01A-12R-A251-31	Primary Tumor	A>B	A>B
TCGA-VQ-AA64-01A-11R-A414-31	Primary Tumor	A>B	A>B
TCGA-VQ-A922-01A-11R-A414-31	Primary Tumor	A>B	A>B
TCGA-BR-8678-01A-11R-2402-13	Primary Tumor	A>B	A>B
TCGA-CG-5721-01A-11R-1602-13	Primary Tumor	A>B	A>B
TCGA-BR-A4CR-01A-11R-A24K-31	Primary Tumor	A>B	A>B
TCGA-BR-6458-01A-11R-1802-13	Primary Tumor	A>B	A>B
TCGA-BR-8484-01A-11R-2402-13	Primary Tumor	A>B	A>B
TCGA-BR-6456-01A-11R-1802-13	Primary Tumor	A>B	A>B
TCGA-D7-A6EY-01A-21R-A31P-31	Primary Tumor	A>B	A<B
TCGA-BR-8364-01A-11R-2343-13	Primary Tumor	A>B	A>B
TCGA-ZA-A8F6-01A-23R-A36D-31	Primary Tumor	A>B	A>B
TCGA-HU-A4GC-01A-12R-A251-31	Primary Tumor	A>B	A<B
TCGA-HU-A4GY-01A-21R-A24K-31	Primary Tumor	A>B	A>B
TCGA-CD-5813-01A-11R-1602-13	Primary Tumor	A>B	A>B
TCGA-CD-8534-01A-11R-2343-13	Primary Tumor	A>B	A>B
TCGA-VQ-AA6F-01A-31R-A414-31	Primary Tumor	A>B	A<B
TCGA-BR-8081-01A-11R-2343-13	Primary Tumor	A>B	A>B
TCGA-HU-A4GT-01A-21R-A251-31	Primary Tumor	A>B	A>B
TCGA-BR-7723-01A-11R-2055-13	Primary Tumor	A>B	A>B
TCGA-BR-8289-01A-11R-2343-13	Primary Tumor	A>B	A<B
TCGA-IP-7968-01A-11R-2203-13	Primary Tumor	A>B	A>B
TCGA-CG-4440-01A-01R-1157-13	Primary Tumor	A<B	A<B
TCGA-F1-6875-01A-11R-2055-13	Primary Tumor	A>B	A>B
TCGA-HU-8244-01A-11R-2343-13	Primary Tumor	A<B	A<B
TCGA-R5-A805-01A-11R-A36D-31	Primary Tumor	A>B	A>B
TCGA-FP-8209-01A-11R-2343-13	Primary Tumor	A>B	A>B
TCGA-3M-AB47-01A-22R-A414-31	Primary Tumor	A>B	A>B
TCGA-KB-A93J-01A-11R-A39E-31	Primary Tumor	A<B	A<B
TCGA-IN-A6RN-01A-12R-A33Y-31	Primary Tumor	A>B	A>B
TCGA-D7-6526-01A-11R-1802-13	Primary Tumor	A>B	A>B
TCGA-VQ-A924-01A-11R-A414-31	Primary Tumor	A>B	A>B
TCGA-CG-4443-01A-01R-1157-13	Primary Tumor	A<B	A<B
TCGA-D7-A4YU-01A-21R-A251-31	Primary Tumor	A>B	A<B
TCGA-IN-A6RJ-01A-21R-A33Y-31	Primary Tumor	A<B	A<B
TCGA-IN-A6RO-01A-12R-A33Y-31	Primary Tumor	A>B	A>B
TCGA-VQ-A928-01A-11R-A414-31	Primary Tumor	A>B	A>B
TCGA-CG-4304-01A-01R-1157-13	Primary Tumor	A>B	A>B
TCGA-HU-A4GP-01A-11R-A251-31	Primary Tumor	A>B	A>B
TCGA-CG-4305-01A-01R-1157-13	Primary Tumor	A>B	A>B
TCGA-R5-A7ZE-01B-11R-A354-31	Primary Tumor	A>B	A>B
TCGA-BR-6453-01A-11R-1802-13	Primary Tumor	A>B	A>B
TCGA-HF-7134-01A-11R-2055-13	Primary Tumor	A>B	A>B
TCGA-HU-A4GJ-01A-11R-A251-31	Primary Tumor	A>B	A>B
TCGA-VQ-AA6A-01A-11R-A414-31	Primary Tumor	A>B	A>B
TCGA-D7-A6EZ-01A-11R-A31P-31	Primary Tumor	A>B	A>B
TCGA-D7-6528-01A-11R-1802-13	Primary Tumor	A>B	A>B
TCGA-BR-4267-01A-01R-1131-13	Primary Tumor	A>B	A>B
TCGA-VQ-A91A-01A-11R-A414-31	Primary Tumor	A>B	A>B
TCGA-VQ-A8PE-01A-11R-A414-31	Primary Tumor	A>B	A>B
TCGA-BR-7722-01A-31R-2203-13	Primary Tumor	A>B	A>B
TCGA-BR-A4PF-01A-11R-A251-31	Primary Tumor	A>B	A<B
TCGA-CG-5722-01A-21R-1602-13	Primary Tumor	A>B	A>B
TCGA-CG-4306-01A-01R-1157-13	Primary Tumor	A>B	A>B
TCGA-BR-A4J7-01A-31R-A251-31	Primary Tumor	A>B	A>B
TCGA-CG-5734-01A-11R-1602-13	Primary Tumor	A>B	A>B
TCGA-BR-4279-01A-01R-1131-13	Primary Tumor	A>B	A>B
TCGA-HU-A4G2-01A-11R-A251-31	Primary Tumor	A>B	A>B
TCGA-BR-8059-01A-11R-2343-13	Primary Tumor	A>B	A>B
TCGA-CD-8535-01A-11R-2343-13	Primary Tumor	A>B	A>B
TCGA-BR-7851-01A-11R-2203-13	Primary Tumor	A>B	A>B
TCGA-D7-8579-01A-11R-2343-13	Primary Tumor	A>B	A>B
TCGA-IN-A7NU-01A-22R-A354-31	Primary Tumor	A>B	A>B
TCGA-BR-8588-01A-11R-2402-13	Primary Tumor	A>B	A>B
TCGA-VQ-A8PJ-01A-11R-A414-31	Primary Tumor	A>B	A<B
TCGA-IN-AB1X-01A-11R-A39E-31	Primary Tumor	A>B	A>B
TCGA-CG-5724-01A-11R-1602-13	Primary Tumor	A>B	A>B
TCGA-VQ-A8E0-01A-11R-A414-31	Primary Tumor	A>B	A<B
TCGA-D7-6524-01A-11R-1802-13	Primary Tumor	A>B	A>B
TCGA-D7-A748-01A-12R-A32D-31	Primary Tumor	A>B	A>B
TCGA-VQ-A91K-01A-11R-A414-31	Primary Tumor	A<B	A<B
TCGA-BR-4370-01A-01R-1157-13	Primary Tumor	A>B	A>B
TCGA-CG-4438-01A-01R-1157-13	Primary Tumor	A>B	A<B
TCGA-VQ-A8PC-01A-11R-A39E-31	Primary Tumor	A>B	A>B
TCGA-CD-A48C-01A-11R-A24K-31	Primary Tumor	A>B	A>B
TCGA-BR-8382-01A-11R-2402-13	Primary Tumor	A>B	A>B
TCGA-R5-A7ZF-01A-11R-A354-31	Primary Tumor	A>B	A>B
TCGA-IN-AB1V-01A-21R-A414-31	Primary Tumor	A<B	A<B
TCGA-KB-A93G-01A-11R-A39E-31	Primary Tumor	A>B	A>B
TCGA-FP-7916-01A-11R-2203-13	Primary Tumor	A>B	A>B
TCGA-D7-8572-01A-11R-2343-13	Primary Tumor	A>B	A>B
TCGA-R5-A7ZR-01A-11R-A354-31	Primary Tumor	A>B	A<B
TCGA-CD-5799-01A-11R-1602-13	Primary Tumor	A>B	A>B
TCGA-VQ-A8PU-01A-12R-A414-31	Primary Tumor	A>B	A>B
TCGA-VQ-A91D-01A-11R-A414-31	Primary Tumor	A>B	A>B
TCGA-BR-4363-01A-01R-1157-13	Primary Tumor	A>B	A>B
TCGA-BR-7707-01A-11R-2055-13	Primary Tumor	A>B	A>B
TCGA-VQ-A94T-01A-11R-A414-31	Primary Tumor	A>B	A>B
TCGA-BR-A44T-01A-32R-A24K-31	Primary Tumor	A>B	A>B
TCGA-HU-A4HD-01A-11R-A251-31	Primary Tumor	A>B	A>B
TCGA-BR-8368-01A-11R-2343-13	Primary Tumor	A>B	A<B
TCGA-BR-8080-01A-11R-2343-13	Primary Tumor	A>B	A>B
TCGA-BR-6564-01A-12R-1884-13	Primary Tumor	A>B	A>B
TCGA-BR-A4J4-01A-12R-A251-31	Primary Tumor	A>B	A>B
TCGA-BR-8384-01A-21R-2402-13	Primary Tumor	A>B	A>B
TCGA-BR-7716-01A-21R-2055-13	Primary Tumor	A>B	A>B
TCGA-FP-7829-01A-11R-2055-13	Primary Tumor	A>B	A<B
TCGA-VQ-A8E7-01B-11R-A414-31	Primary Tumor	A>B	A>B
TCGA-VQ-AA6K-01A-11R-A414-31	Primary Tumor	A>B	A>B
TCGA-VQ-A92D-01A-11R-A414-31	Primary Tumor	A>B	A<B
TCGA-RD-A8N0-01A-12R-A36D-31	Primary Tumor	A>B	A>B
TCGA-BR-8380-01A-11R-2343-13	Primary Tumor	A>B	A>B
TCGA-BR-8592-01A-11R-2402-13	Primary Tumor	A>B	A>B
TCGA-CG-5718-01A-11R-1602-13	Primary Tumor	A>B	A>B
TCGA-F1-6874-01A-11R-1884-13	Primary Tumor	A>B	A>B
TCGA-RD-A8N9-01A-12R-A39E-31	Primary Tumor	A>B	A>B
TCGA-CG-4301-01A-01R-1157-13	Primary Tumor	A>B	A>B
TCGA-BR-6454-01A-11R-1802-13	Primary Tumor	A>B	A>B
TCGA-IN-A6RL-01A-11R-A32D-31	Primary Tumor	A>B	A>B
TCGA-BR-6457-01A-21R-1802-13	Primary Tumor	A>B	A>B
TCGA-MX-A5UG-01A-21R-A31P-31	Primary Tumor	A>B	A>B
TCGA-CG-4475-01A-01R-1157-13	Primary Tumor	A>B	A>B
TCGA-IN-A6RI-01A-11R-A32D-31	Primary Tumor	A>B	A<B
TCGA-B7-A5TI-01A-11R-A31P-31	Primary Tumor	A>B	A>B
TCGA-BR-A4J6-01A-11R-A251-31	Primary Tumor	A>B	A>B
TCGA-D7-A74A-01A-11R-A32D-31	Primary Tumor	A>B	A>B
TCGA-CG-4441-01A-01R-1802-13	Primary Tumor	A>B	A<B
TCGA-BR-8591-01A-11R-2402-13	Primary Tumor	A>B	A>B
TCGA-CD-5804-01A-12R-2055-13	Primary Tumor	A>B	A>B
TCGA-BR-6705-01A-12R-1884-13	Primary Tumor	A>B	A>B
TCGA-MX-A5UJ-01A-11R-A31P-31	Primary Tumor	A>B	A>B
TCGA-CD-8526-01A-11R-2343-13	Primary Tumor	A>B	A>B
TCGA-BR-8361-01A-11R-2343-13	Primary Tumor	A<B	A>B
TCGA-BR-A44U-01A-11R-A36D-31	Primary Tumor	A>B	A>B
TCGA-BR-4366-01A-01R-1157-13	Primary Tumor	A>B	A>B
TCGA-VQ-A91E-01A-31R-A414-31	Primary Tumor	A>B	A>B
TCGA-VQ-A8PH-01A-12R-A414-31	Primary Tumor	A>B	A>B
TCGA-D7-A6F0-01A-11R-A31P-31	Primary Tumor	A>B	A>B
TCGA-VQ-A8PO-01A-11R-A414-31	Primary Tumor	A>B	A>B
TCGA-VQ-A8PF-01A-11R-A414-31	Primary Tumor	A>B	A>B
TCGA-RD-A7BT-01A-11R-A33Y-31	Primary Tumor	A>B	A>B
TCGA-BR-8295-01A-11R-2343-13	Primary Tumor	A>B	A>B
TCGA-CG-4437-01A-01R-1802-13	Primary Tumor	A>B	A>B
TCGA-HU-A4H3-01A-21R-A251-31	Primary Tumor	A>B	A>B
TCGA-BR-6803-01A-11R-1884-13	Primary Tumor	A>B	A>B
TCGA-VQ-A94U-01A-12R-A414-31	Primary Tumor	A>B	A>B
TCGA-BR-6802-01A-11R-1884-13	Primary Tumor	A>B	A>B
TCGA-HF-A5NB-01A-11R-A31P-31	Primary Tumor	A>B	A>B
TCGA-BR-8373-01A-11R-2343-13	Primary Tumor	A>B	A>B
TCGA-D7-8570-01A-11R-2343-13	Primary Tumor	A>B	A>B
TCGA-FP-8631-01A-11R-2402-13	Primary Tumor	A>B	A>B
TCGA-RD-A8MV-01A-11R-A36D-31	Primary Tumor	A>B	A>B
TCGA-CD-8531-01A-11R-2343-13	Primary Tumor	A>B	A>B
TCGA-VQ-A8PX-01A-12R-A414-31	Primary Tumor	A>B	A>B
TCGA-HU-A4G3-01A-11R-A24K-31	Primary Tumor	A>B	A<B
TCGA-BR-7959-01A-11R-2343-13	Primary Tumor	A>B	A>B
TCGA-VQ-A94R-01A-11R-A414-31	Primary Tumor	A>B	A<B
TCGA-BR-4368-01A-01R-1157-13	Primary Tumor	A>B	A>B
TCGA-RD-A8N1-01A-12R-A36D-31	Primary Tumor	A>B	A>B
TCGA-3M-AB46-01A-11R-A414-31	Primary Tumor	A>B	A>B
TCGA-BR-A4J8-01A-11R-A251-31	Primary Tumor	A>B	A>B
TCGA-F1-A448-01A-11R-A24K-31	Primary Tumor	A>B	A>B
TCGA-BR-8487-01A-11R-2402-13	Primary Tumor	A>B	A>B
TCGA-HU-8602-01A-11R-2402-13	Primary Tumor	A>B	A>B
TCGA-VQ-A91Z-01A-11R-A414-31	Primary Tumor	A>B	A<B
TCGA-BR-8690-01A-11R-2402-13	Primary Tumor	A>B	A>B
TCGA-RD-A8NB-01A-12R-A39E-31	Primary Tumor	A>B	A>B
TCGA-CD-8528-01A-11R-2343-13	Primary Tumor	A>B	A>B
TCGA-D7-8573-01A-11R-2343-13	Primary Tumor	A<B	A<B
TCGA-CG-5716-01A-21R-1802-13	Primary Tumor	A<B	A<B
TCGA-BR-4294-01A-01R-1131-13	Primary Tumor	A>B	A<B
TCGA-CD-8532-01A-11R-2343-13	Primary Tumor	A>B	A>B
TCGA-HU-A4GU-01A-11R-A251-31	Primary Tumor	A>B	A>B
TCGA-HU-A4H0-01A-11R-A251-31	Primary Tumor	A>B	A>B
TCGA-BR-8077-01A-11R-2343-13	Primary Tumor	A>B	A>B
TCGA-VQ-A91Q-01A-12R-A414-31	Primary Tumor	A>B	A>B
TCGA-HU-8610-01A-22R-2402-13	Primary Tumor	A>B	A>B
TCGA-HU-8249-01A-11R-A36D-31	Primary Tumor	A>B	A>B
TCGA-KB-A93H-01A-11R-A39E-31	Primary Tumor	A>B	A>B
TCGA-SW-A7EA-01A-12R-A354-31	Primary Tumor	A>B	A>B
TCGA-CD-5803-01A-11R-1602-13	Primary Tumor	A>B	A>B
TCGA-D7-6520-01A-11R-1802-13	Primary Tumor	A<B	A<B
TCGA-D7-6818-01A-11R-1884-13	Primary Tumor	A>B	A>B
TCGA-CD-8525-01A-11R-2343-13	Primary Tumor	A>B	A>B
TCGA-CD-8533-01A-11R-2343-13	Primary Tumor	A>B	A<B
TCGA-FP-8210-01A-11R-2343-13	Primary Tumor	A>B	A>B
TCGA-D7-6519-01A-11R-1802-13	Primary Tumor	A<B	A>B
TCGA-HU-8608-01A-11R-2402-13	Primary Tumor	A>B	A<B
TCGA-CG-4466-01A-01R-1157-13	Primary Tumor	A>B	A>B
TCGA-CG-4442-01A-01R-1157-13	Primary Tumor	A>B	A>B
TCGA-VQ-A94O-01A-11R-A414-31	Primary Tumor	A>B	A>B
TCGA-RD-A7BW-01A-11R-A32D-31	Primary Tumor	A>B	A>B
TCGA-F1-A72C-01A-21R-A33Y-31	Primary Tumor	A>B	A>B
TCGA-BR-7704-01A-11R-2055-13	Primary Tumor	A>B	A>B
TCGA-VQ-A8PQ-01A-11R-A414-31	Primary Tumor	A>B	A>B
TCGA-RD-A8MW-01A-11R-A36D-31	Primary Tumor	A>B	A>B
TCGA-RD-A8N4-01A-21R-A36D-31	Primary Tumor	A>B	A>B
TCGA-HU-A4G8-01A-11R-A251-31	Primary Tumor	A>B	A>B
TCGA-BR-4253-01A-01R-1131-13	Primary Tumor	A>B	A>B
TCGA-BR-A4IV-01A-31R-A251-31	Primary Tumor	A>B	A>B
TCGA-HU-A4GH-01A-11R-A24K-31	Primary Tumor	A>B	A<B
TCGA-BR-8381-01A-11R-2402-13	Primary Tumor	A>B	A>B
TCGA-D7-A747-01A-22R-A33Y-31	Primary Tumor	A>B	A>B
TCGA-BR-4357-01A-01R-1157-13	Primary Tumor	A>B	A>B
TCGA-HU-A4H6-01A-11R-A251-31	Primary Tumor	A>B	A>B
TCGA-KB-A6F7-01A-12R-A32D-31	Primary Tumor	A>B	A>B
TCGA-D7-5577-01A-01R-1602-13	Primary Tumor	A>B	A>B
TCGA-VQ-A8DV-01A-12R-A36D-31	Primary Tumor	A>B	A>B
TCGA-CD-8530-01A-11R-2343-13	Primary Tumor	A>B	A>B
TCGA-VQ-A927-01A-12R-A414-31	Primary Tumor	A<B	A<B
TCGA-D7-6525-01A-11R-1802-13	Primary Tumor	A>B	A>B
TCGA-FP-8211-01A-11R-2343-13	Primary Tumor	A>B	A>B
TCGA-BR-8676-01A-11R-2402-13	Primary Tumor	A>B	A>B
TCGA-IN-7806-01A-11R-2055-13	Primary Tumor	A>B	A<B
TCGA-HF-7133-01A-11R-2055-13	Primary Tumor	A>B	A<B
TCGA-VQ-A923-01A-11R-A414-31	Primary Tumor	A>B	A>B
TCGA-CG-5717-01A-11R-1602-13	Primary Tumor	A>B	A>B
TCGA-CD-5801-01A-11R-1602-13	Primary Tumor	A<B	A>B
TCGA-BR-4371-01A-01R-1157-13	Primary Tumor	A>B	A<B
TCGA-VQ-A91N-01A-11R-A414-31	Primary Tumor	A>B	A<B
TCGA-BR-8589-01A-11R-2402-13	Primary Tumor	A>B	A>B
TCGA-CG-5719-01A-11R-1602-13	Primary Tumor	A>B	A>B
TCGA-D7-8574-01A-13R-2343-13	Primary Tumor	A>B	A>B
TCGA-B7-A5TN-01A-21R-A31P-31	Primary Tumor	A>B	A>B
TCGA-BR-7957-01A-11R-2203-13	Primary Tumor	A>B	A>B
TCGA-CG-5720-01A-11R-1602-13	Primary Tumor	A>B	A>B
TCGA-CD-5800-01A-11R-1602-13	Primary Tumor	A>B	A>B
TCGA-BR-4201-01A-01R-1131-13	Primary Tumor	A>B	A>B
TCGA-HF-7131-01A-11R-2055-13	Primary Tumor	A>B	A>B
TCGA-CD-8529-01A-11R-2343-13	Primary Tumor	A>B	A>B
TCGA-IN-A7NT-01A-21R-A354-31	Primary Tumor	A>B	A>B
TCGA-VQ-AA6J-01A-11R-A414-31	Primary Tumor	A>B	A<B
TCGA-BR-8371-01A-11R-2343-13	Primary Tumor	A>B	A>B
TCGA-CG-4476-01A-01R-1157-13	Primary Tumor	A>B	A>B
TCGA-BR-4280-01A-01R-1131-13	Primary Tumor	A>B	A>B
TCGA-BR-6566-01A-11R-1802-13	Primary Tumor	A>B	A>B
TCGA-D7-A4YX-01A-11R-A251-31	Primary Tumor	A>B	A<B
TCGA-BR-8485-01A-11R-2402-13	Primary Tumor	A>B	A>B
TCGA-B7-A5TK-01A-12R-A36D-31	Primary Tumor	A>B	A>B
TCGA-BR-7197-01A-11R-2203-13	Primary Tumor	A>B	A>B
TCGA-CD-8524-01A-11R-2343-13	Primary Tumor	A>B	A>B
TCGA-D7-6527-01A-11R-1802-13	Primary Tumor	A>B	A>B
TCGA-VQ-AA68-01A-11R-A414-31	Primary Tumor	A<B	A>B
TCGA-MX-A663-01A-11R-A31P-31	Primary Tumor	A>B	A>B
TCGA-VQ-A8P2-01A-11R-A36D-31	Primary Tumor	A>B	A>B
TCGA-VQ-A8PM-01A-21R-A414-31	Primary Tumor	A>B	A>B
TCGA-VQ-A8DU-01A-11R-A36D-31	Primary Tumor	A>B	A>B
TCGA-CG-5723-01A-11R-1602-13	Primary Tumor	A>B	A>B
TCGA-BR-4257-01A-01R-1131-13	Primary Tumor	A>B	A>B
TCGA-HU-A4H2-01A-11R-A251-31	Primary Tumor	A>B	A>B
TCGA-BR-8483-01A-31R-2402-13	Primary Tumor	A>B	A>B
TCGA-BR-7958-01A-21R-2343-13	Primary Tumor	A>B	A>B
TCGA-BR-8296-01A-11R-2343-13	Primary Tumor	A>B	A>B
TCGA-FP-A9TM-01A-11R-A39E-31	Primary Tumor	A>B	A<B
TCGA-CG-4477-01A-01R-1157-13	Primary Tumor	A>B	A>B
TCGA-HU-A4GQ-01A-11R-A36D-31	Primary Tumor	A>B	A>B
TCGA-BR-8284-01A-11R-2343-13	Primary Tumor	A>B	A>B
TCGA-BR-8590-01A-11R-2402-13	Primary Tumor	A>B	A>B
TCGA-CD-8527-01A-11R-2343-13	Primary Tumor	A>B	A>B
TCGA-CG-4465-01A-01R-1157-13	Primary Tumor	A>B	A>B
TCGA-BR-8677-01A-11R-2402-13	Primary Tumor	A>B	A>B
TCGA-R5-A7O7-01A-11R-A33Y-31	Primary Tumor	A>B	A>B
TCGA-VQ-AA69-01A-11R-A414-31	Primary Tumor	A>B	A<B
TCGA-BR-8286-01A-12R-2343-13	Primary Tumor	A>B	A>B
TCGA-D7-5578-01A-01R-1602-13	Primary Tumor	A>B	A>B
TCGA-BR-6710-01A-11R-1884-13	Primary Tumor	A>B	A>B
TCGA-IN-A6RR-01A-12R-A32D-31	Primary Tumor	A>B	A>B
TCGA-VQ-A8PB-01A-11R-A39E-31	Primary Tumor	A>B	A>B
TCGA-D7-6815-01A-11R-1884-13	Primary Tumor	A>B	A<B
TCGA-HU-A4HB-01A-12R-A251-31	Primary Tumor	A>B	A<B
TCGA-BR-8365-01A-21R-2343-13	Primary Tumor	A>B	A>B
TCGA-VQ-A91Y-01A-11R-A414-31	Primary Tumor	A>B	A>B
TCGA-BR-4369-01A-01R-1157-13	Primary Tumor	A>B	A>B
TCGA-FP-7998-01A-11R-2203-13	Primary Tumor	A>B	A<B
TCGA-BR-8687-01A-11R-2402-13	Primary Tumor	A>B	A>B
TCGA-VQ-AA6G-01A-11R-A414-31	Primary Tumor	A<B	A>B
TCGA-CD-A4MG-01A-11R-A251-31	Primary Tumor	A>B	A>B
TCGA-HU-8604-01A-11R-2402-13	Primary Tumor	A>B	A>B
TCGA-BR-A4QL-01A-31R-A251-31	Primary Tumor	A>B	A>B
TCGA-RD-A8N5-01A-12R-A36D-31	Primary Tumor	A>B	A>B
TCGA-BR-6801-01A-11R-1884-13	Primary Tumor	A>B	A>B
TCGA-CD-A4MH-01A-11R-A251-31	Primary Tumor	A>B	A>B
TCGA-HU-A4GX-01A-12R-A251-31	Primary Tumor	A>B	A<B
TCGA-EQ-8122-01A-11R-2343-13	Primary Tumor	A>B	A>B
TCGA-RD-A7C1-01A-11R-A32D-31	Primary Tumor	A>B	A>B
TCGA-SW-A7EB-01A-11R-A354-31	Primary Tumor	A>B	A>B
TCGA-HF-7132-01A-11R-2055-13	Primary Tumor	A>B	A>B
TCGA-FP-8099-01A-11R-2343-13	Primary Tumor	A>B	A>B
TCGA-CG-5726-01A-11R-1602-13	Primary Tumor	A>B	A<B
TCGA-D7-8578-01A-21R-2343-13	Primary Tumor	A>B	A>B
TCGA-B7-A5TJ-01A-11R-A31P-31	Primary Tumor	A>B	A<B
TCGA-CD-A489-01A-11R-A24K-31	Primary Tumor	A>B	A>B
TCGA-BR-8680-01A-11R-2402-13	Primary Tumor	A>B	A>B
TCGA-D7-8576-01A-11R-2343-13	Primary Tumor	A>B	A<B
TCGA-BR-8060-01A-11R-2343-13	Primary Tumor	A>B	A>B
TCGA-VQ-A91V-01A-11R-A414-31	Primary Tumor	A<B	A<B
TCGA-VQ-A91S-01A-11R-A414-31	Primary Tumor	A>B	A>B
TCGA-CG-5725-01A-11R-1602-13	Primary Tumor	A>B	A>B
TCGA-D7-8575-01A-11R-2343-13	Primary Tumor	A>B	A>B
TCGA-CD-A48A-01A-12R-A36D-31	Primary Tumor	A>B	A>B
TCGA-FP-7735-01A-11R-2055-13	Primary Tumor	A>B	A<B
TCGA-VQ-A8E3-01A-11R-A39E-31	Primary Tumor	A>B	A>B
TCGA-HU-A4GP-11A-21R-A251-31	Tumor_adjacent	A>B	A>B
TCGA-IN-8663-11A-01R-2402-13	Tumor_adjacent	A<B	A<B
TCGA-CG-5722-11A-02R-1602-13	Tumor_adjacent	A>B	A>B
TCGA-CG-5728-11A-01R-1602-13	Tumor_adjacent	A>B	A>B
TCGA-BR-6457-11A-01R-1802-13	Tumor_adjacent	A>B	A<B
TCGA-BR-6453-11A-01R-1802-13	Tumor_adjacent	A>B	A>B
TCGA-BR-6454-11A-01R-1802-13	Tumor_adjacent	A>B	A>B
TCGA-CG-5730-11A-01R-1602-13	Tumor_adjacent	A>B	A<B
TCGA-FP-7829-11A-01R-2055-13	Tumor_adjacent	A>B	A>B
TCGA-HU-8238-11A-01R-2343-13	Tumor_adjacent	A<B	A<B
TCGA-IN-AB1V-11A-11R-A414-31	Tumor_adjacent	A>B	A<B
TCGA-IN-AB1X-11A-21R-A39E-31	Tumor_adjacent	A>B	A>B
TCGA-IP-7968-11A-01R-2203-13	Tumor_adjacent	A>B	A>B
TCGA-BR-7703-11A-01R-2055-13	Tumor_adjacent	A>B	A>B
TCGA-CG-5733-11A-01R-1602-13	Tumor_adjacent	A>B	A>B
TCGA-HU-A4HB-11A-11R-A251-31	Tumor_adjacent	A>B	A>B
TCGA-HU-A4GN-11A-12R-A251-31	Tumor_adjacent	A>B	A>B
TCGA-BR-7851-11A-01R-2203-13	Tumor_adjacent	A<B	A<B
TCGA-BR-7715-11A-01R-2055-13	Tumor_adjacent	A>B	A>B
TCGA-BR-6802-11A-01R-1884-13	Tumor_adjacent	A<B	A>B
TCGA-IN-7806-11A-01R-2055-13	Tumor_adjacent	A<B	A<B
TCGA-CG-5734-11A-01R-1602-13	Tumor_adjacent	A>B	A>B
TCGA-HU-A4GC-11A-11R-A251-31	Tumor_adjacent	A>B	A>B
TCGA-FP-7735-11A-01R-2055-13	Tumor_adjacent	A>B	A>B
TCGA-HU-A4GY-11A-11R-A36D-31	Tumor_adjacent	A>B	A>B
TCGA-BR-7716-11A-01R-2055-13	Tumor_adjacent	A>B	A>B
TCGA-BR-7704-11A-01R-2055-13	Tumor_adjacent	A>B	A>B
TCGA-CG-5720-11A-01R-1602-13	Tumor_adjacent	A<B	A<B
TCGA-BR-7717-11A-01R-2055-13	Tumor_adjacent	A>B	A>B
TCGA-BR-8060-11A-01R-2343-13	Tumor_adjacent	A>B	A>B
TCGA-CG-5721-11A-01R-1602-13	Tumor_adjacent	A<B	A<B
TCGA-HU-A4GH-11A-11R-A36D-31	Tumor_adjacent	A>B	A>B

[truncated: 11 more sheets: GSE19826, GSE35809, GSE51105, GSE26253, GSE15459, GSE62254, GSE84437, GSE26942, GSE106656, GSE34619, GSE60662]
